# Supplementary material for: Coordinated nitrate anions can be directional π-hole donors in the solid state: a CSD study
Source: Royal Society of Chemistry journal article supplement (doi:10.1039/c7ce01266g), 2017-01-01
Supplement: c7ce01266g1.pdf [file c7ce01266g1.pdf]

Electronic Supplementary Information accompanying the paper:

# Coordinated nitrate anions can be directional $\pi$ -hole donors in the solid state; a CSD study

Tiddo J. Mooibroek

van 't Hoff Institute for Molecular Sciences, Universiteit van Amsterdam, Science Park 904, 1098 XH Amsterdam, The Netherlands; E-mail: t.j.mooibroek@uva.nl

|                                                                                                                                |    |
|--------------------------------------------------------------------------------------------------------------------------------|----|
| Details of methodology and overview of supporting material .....                                                               | 2  |
| <b>Table S1</b> Numerical overview of CSD searches performed .....                                                             | 7  |
| <b>Table S2</b> Overview of close contacts with $sp^2$ O-atoms .....                                                           | 16 |
| <b>Figure S1</b> Possible coordination modes found for an $NO_3^-$ anion .....                                                 | 3  |
| <b>Figure S2</b> Distribution of metals coordinated by a nitrate anion in any fashion .....                                    | 4  |
| <b>Figure S3</b> Distribution of metals $\eta^1$ coordinated by a nitrate anion .....                                          | 5  |
| <b>Figure S4</b> Distribution of metals $\eta^2$ coordinated by a nitrate anion .....                                          | 6  |
| <b>Figure S5</b> Simplified schematic of the most general query used .....                                                     | 8  |
| <b>Figure S6</b> 3D, 4D and $N(r)$ plots for any coordination mode and any <b>EIR</b> .....                                    | 8  |
| <b>Figure S7</b> 3D, 4D and $N(r)$ plots for any coordination mode and any <b>N</b> .....                                      | 8  |
| <b>Figure S8</b> 3D, 4D and $N(r)$ plots for any coordination mode and any <b>O</b> .....                                      | 9  |
| <b>Figure S9</b> 3D, 4D and $N(r)$ plots for any coordination mode and any <b>S</b> .....                                      | 9  |
| <b>Figure S10</b> 3D, 4D and $N(r)$ plots for any coordination mode and any <b>Cl</b> .....                                    | 9  |
| <b>Figure S11</b> 3D plots for any coordination mode and any <b>F, P, As, Se, Br</b> or <b>I</b> .....                         | 10 |
| <b>Figure S12</b> 3D, 4D and $N(r)$ plots for any coordination mode and <b>R=O</b> .....                                       | 10 |
| <b>Figure S13</b> 3D, 4D and $N(r)$ plots for any coordination mode and <b>ROH</b> .....                                       | 11 |
| <b>Figure S14</b> 3D, 4D and $N(r)$ plots for any coordination mode and <b>H<sub>2</sub>O</b> .....                            | 11 |
| <b>Figure S15</b> 3D, 4D and $N(r)$ plots for $\eta^1 NO_3^-$ with <b>EIR, ROH</b> and <b>R=O</b> .....                        | 12 |
| <b>Figure S16</b> 3D, 4D and $N(r)$ plots for $\eta^2 NO_3^-$ with <b>EIR, ROH</b> and <b>R=O</b> .....                        | 13 |
| <b>Figure S17</b> 3D, 4D and $N(r)$ plots for $2\eta^1\mu$ and $2\eta^1\mu NO_3^-$ with <b>EIR, ROH</b> and <b>R=O</b> .....   | 14 |
| <b>Figure S18</b> 3D plots for $\eta^2\eta^1$ , $2\eta^2\mu$ and $3\eta^1\mu NO_3^-$ with <b>EIR, ROH</b> and <b>R=O</b> ..... | 15 |

|                         |  |
|-------------------------|--|
| <b>References .....</b> |  |
| 19                      |  |

## Details of methodology and overview of supporting material

The CSD<sup>1</sup> version 5.37 (November 2015, including three updates (until May 2016)) was inspected on the 23<sup>rd</sup> of March 2017 using ConQuest (version 1.19) and the data was limited to high quality structures ( $R \leq 0.1$ ), excluding structures determined by powder diffraction. An initial dataset was created that contained a  $\text{NO}_3^-$  anion with at least one of its O-atoms attached to a metal (NB: the PDB was also inspected with an identical query using Relibase, but no such structures could be retrieved). This query yielded 11,208 crystallographic information files (CIFs). This dataset was further dissected by using as discriminators the number of metals attached to  $\text{NO}_3^-$ , the coordination mode in terms of hapticity ( $\eta$ ) and the possible bridging function of an O-atom ( $\mu$ ). The type of metal atom and its charge were left unspecified. This resulted in the 27 different datasets as specified in Figure S1.

To obtain some idea about what metals are most frequently coordinated by nitrate anions, three separate searches were performed: one for the largest (initial) dataset containing any type of nitrate coordination; one limited to  $\eta^1$  coordinated  $\text{NO}_3^-$  and one limited to  $\eta^2$  coordinated  $\text{NO}_3^-$ . These data were analyzed and the relative occurrence for each metal was projected on a periodic table as shown in Figures S2 – S4.

Shown in Table S1 is a numerical overview of the data that was obtained to assess possible  $\pi$ -hole interactions with coordinated nitrate. Figure S5 represents a simplified schematic for the most general query used to generate these data. For this most generic search, a dataset was created that contained a  $\text{NO}_3^-$  anion with at least one of its O-atoms attached to a metal (M) and an intermolecular N...electron rich atom (EIR) distance ( $d$ ) of  $\leq 5 \text{ \AA}$  (EIR = N, P, As, O, S, Se, Te, F, Cl, Br, I or At). All data are thus confined to a sphere with  $5 \text{ \AA}$  radius, centered on  $\text{NO}_3^-$ . Due to symmetry and for ease of interpretation the data are displayed within a hemisphere. Cartesian coordinates of EIR and the central nitrate were derived as described elsewhere.<sup>2</sup> These coordinates were plotted in a three dimensional plot. Four dimensional density plots were also generated, using 405 grids (X [ $9 \times 10^9 \text{ \AA}$ ], Y [ $9 \times 10^9 \text{ \AA}$ ], Z [ $5 \times 1 \text{ \AA}$ ]).<sup>3</sup> To assess possible van der Waals overlap between EIR and the N-atom of the coordinated nitrate anion, the parallel displacement parameter ( $r$ , see also Figure S5) for EIR was derived<sup>4</sup> and the data characterized by  $r \leq 1 \text{ \AA}$  was plotted as a function of the van der Waals corrected N...EIR distance in an  $N(r)$  plot. These plots ( $3D/4D/N(r)$ ) for this most general query (any EIR, 82,338 hits in 9,288 CIFs) are collected in Figure S6.

This dataset is likely too diverse and was thus scrutinized further based on the binding motif (as illustrated in Figure S1) and the identity of EIR. A numerical overview of all the data is given in Table S1 and relevant plots were only generated in case of sufficient data. First, the data found for any EIR was split up into individual EIR atoms (N, O, F, etc.). Relevant plots for this data are given in Figures S7 – S11. As EIR = O appeared most abundant (45,859 hits in 7,971 CIFs), these data were further split into  $\text{sp}^2$  (R=O) and  $\text{sp}^3$  hybridized oxygen (ROH and  $\text{H}_2\text{O}$ ). To exclude coordinated and protonated O's, these searches were repeated specifying that the O-atom should only be bound as prescribed by its hybridization (i.e. one atom attached for  $\text{sp}^2$  and two atoms attached for  $\text{sp}^3$  hybridization). Relevant plots for these comparative datasets are given in Figure S12 (R=O), Figure S13 (ROH) and Figure S14 ( $\text{H}_2\text{O}$ ). As these comparative plots appeared rather similar, the data presented in the main text has been limited to selected uncoordinated/unprotonated O-derivatives interacting with a coordinated nitrate anion. Next, the binding motifs that were identified in at least 50 CIFs were analyzed considering any electron rich atom (EIR) and uncoordinated/unprotonated  $\text{sp}^2$  (R=O) and  $\text{sp}^3$  OH's (ROH). This gave three datasets for each nitrate binding motif considered, as detailed in Table S1. All relevant plots for these seven data are shown in Figures S15 – S18.

≥ 1 metal

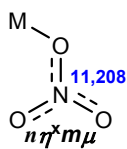

only 1 metal

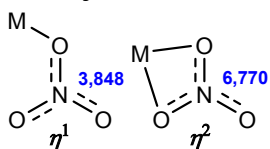

only 2 metals

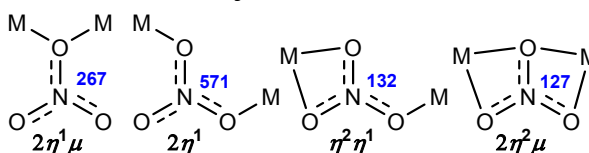

only 3 metals

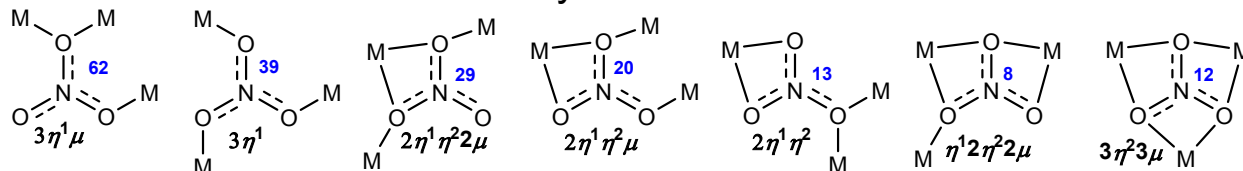

only 4 metals

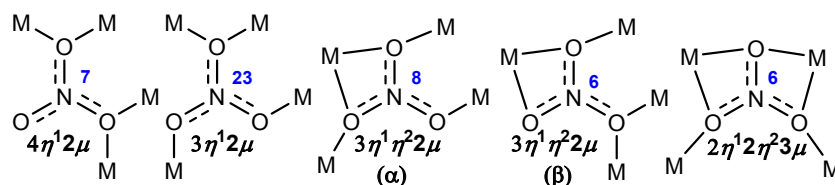

only 5 metals

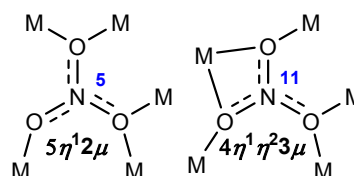

only 6 metals

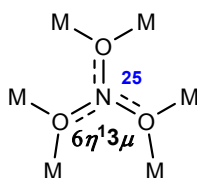

> 2 metals to one O

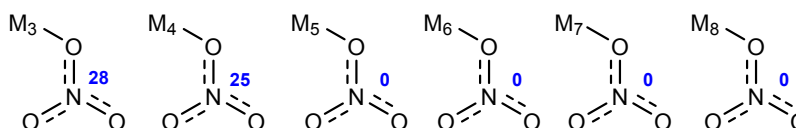

**Figure S1.** Overview of the different possible coordination modes found for an  $\text{NO}_3^-$  anion when coordinated to 1-6 metal atoms. The blue numbers represent the number of crystallographic information files (CIFs) found with that particular coordination mode. For the searches with at least one metal (top left) and for more than 2 metals coordinated to the same O-atom (bottom right) no restrictions were applied. For all other queries the number of attached atoms to the atoms belonging to  $\text{NO}_3^-$  were restricted to the number shown in the figure. For example, for  $\eta^1$  the number of atoms bound to the coordinating O were set to two, and the others were set to one.

|                              |                                  |                                         |                                  |                               |                                 |                               |                                  |                                  |                                 |                                  |                                    |                                   |                                 |                                  |                                  |                                |                                |                              |                              |
|------------------------------|----------------------------------|-----------------------------------------|----------------------------------|-------------------------------|---------------------------------|-------------------------------|----------------------------------|----------------------------------|---------------------------------|----------------------------------|------------------------------------|-----------------------------------|---------------------------------|----------------------------------|----------------------------------|--------------------------------|--------------------------------|------------------------------|------------------------------|
| <sup>1</sup> H<br>0 %<br>0   |                                  |                                         |                                  |                               |                                 |                               |                                  |                                  |                                 |                                  |                                    |                                   |                                 |                                  |                                  |                                | <sup>2</sup> He<br>0 %<br>0    |                              |                              |
| <sup>3</sup> Li<br>0 %<br>0  | <sup>4</sup> Be<br>0.2 %<br>49   |                                         |                                  |                               |                                 |                               |                                  |                                  |                                 |                                  |                                    |                                   |                                 | <sup>5</sup> B<br>0 %<br>2       | <sup>6</sup> C<br>0 %<br>0       | <sup>7</sup> N<br>0 %<br>0     | <sup>8</sup> O<br>0 %<br>0     | <sup>9</sup> F<br>0 %<br>0   | <sup>10</sup> Ne<br>0 %<br>0 |
| <sup>11</sup> Na<br>0 %<br>0 | <sup>12</sup> Mg<br>0.5 %<br>116 |                                         |                                  |                               |                                 |                               |                                  |                                  |                                 |                                  |                                    |                                   |                                 | <sup>13</sup> Al<br>0 %<br>9     | <sup>14</sup> Si<br>0 %<br>8     | <sup>15</sup> P<br>0 %<br>0    | <sup>16</sup> S<br>0 %<br>0    | <sup>17</sup> Cl<br>0 %<br>0 | <sup>18</sup> Ar<br>0 %<br>0 |
| <sup>19</sup> K<br>0 %<br>0  | <sup>20</sup> Ca<br>0.3 %<br>57  | <sup>21</sup> Sc<br>0.5 %<br>115        | <sup>22</sup> Ti<br>0.2 %<br>45  | <sup>23</sup> V<br>0 %<br>9   | <sup>24</sup> Cr<br>0.1 %<br>13 | <sup>25</sup> Mn<br>0 %<br>8  | <sup>26</sup> Fe<br>1.3 %<br>293 | <sup>27</sup> Co<br>0.6 %<br>123 | <sup>28</sup> Ni<br>3 %<br>669  | <sup>29</sup> Cu<br>3.1 %<br>698 | <sup>30</sup> Zn<br>13 %<br>2885   | <sup>31</sup> Ga<br>3.4 %<br>755  | <sup>32</sup> Ge<br>0 %<br>6    | <sup>33</sup> As<br>0 %<br>6     | <sup>34</sup> Se<br>0 %<br>0     | <sup>35</sup> Br<br>0 %<br>0   | <sup>36</sup> Kr<br>0 %<br>0   |                              |                              |
| <sup>37</sup> Rb<br>0 %<br>0 | <sup>38</sup> Sr<br>0 %<br>9     | <sup>39</sup> Y<br>0.3 %<br>66          | <sup>40</sup> Zr<br>1.6 %<br>345 | <sup>41</sup> Nb<br>0 %<br>9  | <sup>42</sup> Mo<br>0 %<br>2    | <sup>43</sup> Tc<br>0 %<br>11 | <sup>44</sup> Ru<br>0 %<br>0     | <sup>45</sup> Rh<br>0.2 %<br>51  | <sup>46</sup> Pd<br>0.2 %<br>36 | <sup>47</sup> Ag<br>0.5 %<br>110 | <sup>48</sup> Cd<br>11.6 %<br>2584 | <sup>49</sup> In<br>6.4 %<br>1424 | <sup>50</sup> Sn<br>0.1 %<br>32 | <sup>51</sup> Sb<br>0.4 %<br>99  | <sup>52</sup> Te<br>0.1 %<br>20  | <sup>53</sup> I<br>0 %<br>0    | <sup>54</sup> Xe<br>0 %<br>0   |                              |                              |
| <sup>55</sup> Cs<br>0 %<br>0 | <sup>56</sup> Ba<br>0.1 %<br>22  | <sup>57-71</sup> La's<br>41.4 %<br>9214 | <sup>72</sup> Hf<br>0.8 %<br>170 | <sup>73</sup> Ta<br>0 %<br>4  | <sup>74</sup> W<br>0 %<br>0     | <sup>75</sup> Re<br>0 %<br>0  | <sup>76</sup> Os<br>0 %<br>9     | <sup>77</sup> Ir<br>0 %<br>7     | <sup>78</sup> Pt<br>0.1 %<br>15 | <sup>79</sup> Au<br>0.6 %<br>143 | <sup>80</sup> Hg<br>0.2 %<br>38    | <sup>81</sup> Tl<br>1.2 %<br>262  | <sup>82</sup> Pb<br>0.1 %<br>22 | <sup>83</sup> Bi<br>3.1 %<br>679 | <sup>84</sup> Po<br>0.7 %<br>165 | <sup>85</sup> At<br>0 %<br>0   | <sup>86</sup> Rn<br>0 %<br>0   |                              |                              |
| <sup>87</sup> Fr<br>0 %<br>0 | <sup>88</sup> Ra<br>0 %<br>0     | <sup>89-103</sup> Ac's<br>3.7 %<br>827  | <sup>104</sup> Rf<br>0 %<br>0    | <sup>105</sup> Db<br>0 %<br>0 | <sup>106</sup> Sg<br>0 %<br>0   | <sup>107</sup> Bh<br>0 %<br>0 | <sup>108</sup> Hs<br>0 %<br>0    | <sup>109</sup> Mt<br>0 %<br>0    | <sup>110</sup> Ds<br>0 %<br>0   | <sup>111</sup> Rg<br>0 %<br>0    | <sup>112</sup> Cn<br>0 %<br>0      | <sup>113</sup> Uut<br>0 %<br>0    | <sup>114</sup> Fl<br>0 %<br>0   | <sup>115</sup> Uup<br>0 %<br>0   | <sup>116</sup> Lv<br>0 %<br>0    | <sup>117</sup> Uus<br>0 %<br>0 | <sup>118</sup> Uuo<br>0 %<br>0 |                              |                              |

|                                |                                   |                                  |                                  |                                   |                                 |                                  |                                   |                                  |                                  |                                  |                                  |                                  |                                  |                                  |
|--------------------------------|-----------------------------------|----------------------------------|----------------------------------|-----------------------------------|---------------------------------|----------------------------------|-----------------------------------|----------------------------------|----------------------------------|----------------------------------|----------------------------------|----------------------------------|----------------------------------|----------------------------------|
| <sup>57</sup> La<br>0.2 %<br>4 | <sup>58</sup> Ce<br>4.9 %<br>1087 | <sup>59</sup> Pr<br>3 %<br>664   | <sup>60</sup> Nd<br>3.1 %<br>679 | <sup>61</sup> Pm<br>5.1 %<br>1130 | <sup>62</sup> Sm<br>0 %<br>0    | <sup>63</sup> Eu<br>2.2 %<br>480 | <sup>64</sup> Gd<br>4.7 %<br>1054 | <sup>65</sup> Tb<br>4.4 %<br>985 | <sup>66</sup> Dy<br>3.8 %<br>851 | <sup>67</sup> Ho<br>4.2 %<br>931 | <sup>68</sup> Er<br>1.2 %<br>278 | <sup>69</sup> Tm<br>2.3 %<br>517 | <sup>70</sup> Yb<br>0.5 %<br>107 | <sup>71</sup> Lu<br>1.8 %<br>400 |
| <sup>89</sup> Ac<br>0 %<br>6   | <sup>90</sup> Th<br>0 %<br>0      | <sup>91</sup> Pa<br>0.8 %<br>186 | <sup>92</sup> U<br>0 %<br>0      | <sup>93</sup> Np<br>2.7 %<br>591  | <sup>94</sup> Pu<br>0.1 %<br>21 | <sup>95</sup> Am<br>0.1 %<br>28  | <sup>96</sup> Cm<br>0 %<br>1      | <sup>97</sup> Rg<br>0 %<br>0     | <sup>98</sup> Cn<br>0 %<br>0     | <sup>99</sup> Uut<br>0 %<br>0    | <sup>100</sup> Fl<br>0 %<br>0    | <sup>101</sup> Uup<br>0 %<br>0   | <sup>102</sup> Lv<br>0 %<br>0    | <sup>103</sup> Uus<br>0 %<br>0   |

**Figure S2.** Schematic representation of the distribution of metals coordinated by a nitrate anion in any fashion. The data represents 22,241 NO<sub>3</sub>–M structures found within 10,343 CIFs (NB: this deviates from the data in Figure S1 because the identity of M is not always given). The color code is meant as a guide to the eye, where red is the highest percentage of data and light blue the lowest.

|                              |                                 |                                      |                                |                               |                               |                                |                                 |                                |                                 |                                 |                                   |                                   |                               |                                 |                                 |                                |                                |                                |                                |                              |                              |                                |                              |                              |                              |                              |                              |                               |                               |                                |                               |                                |
|------------------------------|---------------------------------|--------------------------------------|--------------------------------|-------------------------------|-------------------------------|--------------------------------|---------------------------------|--------------------------------|---------------------------------|---------------------------------|-----------------------------------|-----------------------------------|-------------------------------|---------------------------------|---------------------------------|--------------------------------|--------------------------------|--------------------------------|--------------------------------|------------------------------|------------------------------|--------------------------------|------------------------------|------------------------------|------------------------------|------------------------------|------------------------------|-------------------------------|-------------------------------|--------------------------------|-------------------------------|--------------------------------|
| <sup>1</sup> H<br>0 %<br>0   |                                 |                                      |                                |                               |                               |                                |                                 |                                |                                 |                                 |                                   |                                   |                               |                                 |                                 |                                | <sup>2</sup> He<br>0 %<br>0    |                                |                                |                              |                              |                                |                              |                              |                              |                              |                              |                               |                               |                                |                               |                                |
| <sup>3</sup> Li<br>0 %<br>0  | <sup>4</sup> Be<br>0.9 %<br>19  |                                      |                                |                               |                               |                                |                                 |                                |                                 |                                 |                                   |                                   |                               | <sup>5</sup> B<br>0.1 %<br>2    | <sup>6</sup> C<br>0 %<br>0      | <sup>7</sup> N<br>0 %<br>0     | <sup>8</sup> O<br>0 %<br>0     | <sup>9</sup> F<br>0 %<br>0     | <sup>10</sup> Ne<br>0 %<br>0   |                              |                              |                                |                              |                              |                              |                              |                              |                               |                               |                                |                               |                                |
| <sup>11</sup> Na<br>0 %<br>0 | <sup>12</sup> Mg<br>0.8 %<br>16 |                                      |                                |                               |                               |                                |                                 |                                |                                 |                                 |                                   |                                   |                               | <sup>13</sup> Al<br>0.1 %<br>2  | <sup>14</sup> Si<br>0.3 %<br>6  | <sup>15</sup> P<br>0 %<br>0    | <sup>16</sup> S<br>0 %<br>0    | <sup>17</sup> Cl<br>0 %<br>0   | <sup>18</sup> Ar<br>0 %<br>0   |                              |                              |                                |                              |                              |                              |                              |                              |                               |                               |                                |                               |                                |
| <sup>19</sup> K<br>0 %<br>0  | <sup>20</sup> Ca<br>0.1 %<br>3  | <sup>21</sup> Sc<br>0 %<br>1         | <sup>22</sup> Ti<br>0 %<br>0   | <sup>23</sup> V<br>0.1 %<br>3 | <sup>24</sup> Cr<br>0 %<br>0  | <sup>25</sup> Mn<br>0.1 %<br>2 | <sup>26</sup> Fe<br>1.1 %<br>24 | <sup>27</sup> Co<br>0.4 %<br>8 | <sup>28</sup> Ni<br>4.2 %<br>90 | <sup>29</sup> Cu<br>3.2 %<br>68 | <sup>30</sup> Zn<br>19.5 %<br>414 | <sup>31</sup> Ga<br>5.7 %<br>122  | <sup>32</sup> Ge<br>0 %<br>0  | <sup>33</sup> As<br>0.3 %<br>6  | <sup>34</sup> Se<br>0 %<br>0    | <sup>35</sup> Br<br>0 %<br>0   | <sup>36</sup> Kr<br>0 %<br>0   |                                |                                |                              |                              |                                |                              |                              |                              |                              |                              |                               |                               |                                |                               |                                |
| <sup>37</sup> Rb<br>0 %<br>0 | <sup>38</sup> Sr<br>0 %<br>0    | <sup>39</sup> Y<br>0 %<br>0          | <sup>40</sup> Zr<br>0.1 %<br>3 | <sup>41</sup> Nb<br>0 %<br>0  | <sup>42</sup> Mo<br>0 %<br>0  | <sup>43</sup> Tc<br>0 %<br>0   | <sup>44</sup> Ru<br>0 %<br>0    | <sup>45</sup> Rh<br>0.3 %<br>6 | <sup>46</sup> Pd<br>0.4 %<br>9  | <sup>47</sup> Ag<br>0.9 %<br>20 | <sup>48</sup> Cd<br>35.7 %<br>758 | <sup>49</sup> In<br>12.6 %<br>267 | <sup>50</sup> Sn<br>0 %<br>0  | <sup>51</sup> Sb<br>1.3 %<br>28 | <sup>52</sup> Te<br>0.9 %<br>20 | <sup>53</sup> I<br>0 %<br>0    | <sup>54</sup> Xe<br>0 %<br>0   |                                |                                |                              |                              |                                |                              |                              |                              |                              |                              |                               |                               |                                |                               |                                |
| <sup>55</sup> Cs<br>0 %<br>0 | <sup>56</sup> Ba<br>0 %<br>1    | <sup>57-71</sup> La's<br>0.7 %<br>14 | <sup>72</sup> Hf<br>0 %<br>0   | <sup>73</sup> Ta<br>0 %<br>0  | <sup>74</sup> W<br>0 %<br>0   | <sup>75</sup> Re<br>0 %<br>0   | <sup>76</sup> Os<br>0.2 %<br>4  | <sup>77</sup> Ir<br>0.2 %<br>5 | <sup>78</sup> Pt<br>0.1 %<br>2  | <sup>79</sup> Au<br>3.5 %<br>74 | <sup>80</sup> Hg<br>1 %<br>22     | <sup>81</sup> Tl<br>1.9 %<br>41   | <sup>82</sup> Pb<br>0 %<br>1  | <sup>83</sup> Bi<br>2.4 %<br>52 | <sup>84</sup> Po<br>0.4 %<br>9  | <sup>85</sup> At<br>0 %<br>0   | <sup>86</sup> Rn<br>0 %<br>0   |                                |                                |                              |                              |                                |                              |                              |                              |                              |                              |                               |                               |                                |                               |                                |
| <sup>87</sup> Fr<br>0 %<br>0 | <sup>88</sup> Ra<br>0 %<br>0    | <sup>89-103</sup> Ac's<br>0.1 %<br>2 | <sup>104</sup> Rf<br>0 %<br>0  | <sup>105</sup> Db<br>0 %<br>0 | <sup>106</sup> Sg<br>0 %<br>0 | <sup>107</sup> Bh<br>0 %<br>0  | <sup>108</sup> Hs<br>0 %<br>0   | <sup>109</sup> Mt<br>0 %<br>0  | <sup>110</sup> Ds<br>0 %<br>0   | <sup>111</sup> Rg<br>0 %<br>0   | <sup>112</sup> Cn<br>0 %<br>0     | <sup>113</sup> Uut<br>0 %<br>0    | <sup>114</sup> Fl<br>0 %<br>0 | <sup>115</sup> Uup<br>0 %<br>0  | <sup>116</sup> Lv<br>0 %<br>0   | <sup>117</sup> Uus<br>0 %<br>0 | <sup>118</sup> Uuo<br>0 %<br>0 |                                |                                |                              |                              |                                |                              |                              |                              |                              |                              |                               |                               |                                |                               |                                |
|                              |                                 |                                      |                                |                               |                               |                                |                                 |                                |                                 |                                 |                                   |                                   |                               |                                 |                                 |                                |                                |                                |                                |                              |                              |                                |                              |                              |                              |                              |                              |                               |                               |                                |                               |                                |
|                              |                                 |                                      |                                |                               |                               |                                |                                 |                                |                                 |                                 |                                   |                                   |                               |                                 |                                 |                                |                                | <sup>57</sup> La<br>0.1 %<br>4 | <sup>58</sup> Ce<br>0.1 %<br>2 | <sup>59</sup> Pr<br>0 %<br>1 | <sup>60</sup> Nd<br>0 %<br>0 | <sup>61</sup> Pm<br>0 %<br>0   | <sup>62</sup> Sm<br>0 %<br>0 | <sup>63</sup> Eu<br>0 %<br>0 | <sup>64</sup> Gd<br>0 %<br>1 | <sup>65</sup> Tb<br>0 %<br>1 | <sup>66</sup> Dy<br>0 %<br>0 | <sup>67</sup> Ho<br>0 %<br>1  | <sup>68</sup> Er<br>0 %<br>0  | <sup>69</sup> Tm<br>0.2 %<br>4 | <sup>70</sup> Yb<br>0 %<br>0  | <sup>71</sup> Lu<br>0 %<br>1   |
|                              |                                 |                                      |                                |                               |                               |                                |                                 |                                |                                 |                                 |                                   |                                   |                               |                                 |                                 |                                |                                | <sup>89</sup> Ac<br>0 %<br>6   | <sup>90</sup> Th<br>0 %<br>0   | <sup>91</sup> Pa<br>0 %<br>0 | <sup>92</sup> U<br>0 %<br>0  | <sup>93</sup> Np<br>0.1 %<br>2 | <sup>94</sup> Pu<br>0 %<br>0 | <sup>95</sup> Am<br>0 %<br>0 | <sup>96</sup> Cm<br>0 %<br>0 | <sup>97</sup> Rg<br>0 %<br>0 | <sup>98</sup> Cn<br>0 %<br>0 | <sup>99</sup> Uut<br>0 %<br>0 | <sup>100</sup> Fl<br>0 %<br>0 | <sup>101</sup> Uup<br>0 %<br>0 | <sup>102</sup> Lv<br>0 %<br>0 | <sup>103</sup> Uus<br>0 %<br>0 |

**Figure S3.** Schematic representation of the distribution of metals coordinated by a nitrate anion in a  $\eta^1$  fashion (the M–O bond was specified as acyclic in conquest). The data represents 2,124  $O_2NO(\eta^1)$ –M structures found within 1,403 CIFs (NB: this deviates from the data in Figure S1 because the identity of M is not always given). The color code is meant as a guide to the eye, where red is the highest percentage of data and light blue the lowest.

|                              |                                 |                                         |                                  |                                |                               |                               |                                  |                                 |                                  |                                  |                                  |                                  |                                 |                                  |                                  |                                |                                |
|------------------------------|---------------------------------|-----------------------------------------|----------------------------------|--------------------------------|-------------------------------|-------------------------------|----------------------------------|---------------------------------|----------------------------------|----------------------------------|----------------------------------|----------------------------------|---------------------------------|----------------------------------|----------------------------------|--------------------------------|--------------------------------|
| <sup>1</sup> H<br>0 %<br>0   |                                 |                                         |                                  |                                |                               |                               |                                  |                                 |                                  |                                  |                                  |                                  |                                 |                                  |                                  |                                | <sup>2</sup> He<br>0 %<br>0    |
| <sup>3</sup> Li<br>0 %<br>0  | <sup>4</sup> Be<br>0.1 %<br>16  |                                         |                                  |                                |                               |                               |                                  |                                 |                                  |                                  |                                  | <sup>5</sup> B<br>0 %<br>0       | <sup>6</sup> C<br>0 %<br>0      | <sup>7</sup> N<br>0 %<br>0       | <sup>8</sup> O<br>0 %<br>0       | <sup>9</sup> F<br>0 %<br>0     | <sup>10</sup> Ne<br>0 %<br>0   |
| <sup>11</sup> Na<br>0 %<br>0 | <sup>12</sup> Mg<br>0.5 %<br>66 |                                         |                                  |                                |                               |                               |                                  |                                 |                                  |                                  |                                  | <sup>13</sup> Al<br>0 %<br>5     | <sup>14</sup> Si<br>0 %<br>0    | <sup>15</sup> P<br>0 %<br>0      | <sup>16</sup> S<br>0 %<br>0      | <sup>17</sup> Cl<br>0 %<br>0   | <sup>18</sup> Ar<br>0 %<br>0   |
| <sup>19</sup> K<br>0 %<br>0  | <sup>20</sup> Ca<br>0.2 %<br>33 | <sup>21</sup> Sc<br>0.7 %<br>94         | <sup>22</sup> Ti<br>0.3 %<br>44  | <sup>23</sup> V<br>0 %<br>4    | <sup>24</sup> Cr<br>0 %<br>4  | <sup>25</sup> Mn<br>0 %<br>0  | <sup>26</sup> Fe<br>0.8 %<br>108 | <sup>27</sup> Co<br>0.5 %<br>67 | <sup>28</sup> Ni<br>2.7 %<br>379 | <sup>29</sup> Cu<br>2.1 %<br>304 | <sup>30</sup> Zn<br>4.1 %<br>585 | <sup>31</sup> Ga<br>1.9 %<br>265 | <sup>32</sup> Ge<br>0 %<br>2    | <sup>33</sup> As<br>0 %<br>0     | <sup>34</sup> Se<br>0 %<br>0     | <sup>35</sup> Br<br>0 %<br>0   | <sup>36</sup> Kr<br>0 %<br>0   |
| <sup>37</sup> Rb<br>0 %<br>0 | <sup>38</sup> Sr<br>0 %<br>4    | <sup>39</sup> Y<br>0.3 %<br>46          | <sup>40</sup> Zr<br>2.3 %<br>331 | <sup>41</sup> Nb<br>0.1 %<br>9 | <sup>42</sup> Mo<br>0 %<br>2  | <sup>43</sup> Tc<br>0 %<br>0  | <sup>44</sup> Ru<br>0 %<br>0     | <sup>45</sup> Rh<br>0.1 %<br>16 | <sup>46</sup> Pd<br>0.1 %<br>14  | <sup>47</sup> Ag<br>0 %<br>1     | <sup>48</sup> Cd<br>4.3 %<br>613 | <sup>49</sup> In<br>5.7 %<br>820 | <sup>50</sup> Sn<br>0.1 %<br>13 | <sup>51</sup> Sb<br>0.3 %<br>40  | <sup>52</sup> Te<br>0 %<br>0     | <sup>53</sup> I<br>0 %<br>0    | <sup>54</sup> Xe<br>0 %<br>0   |
| <sup>55</sup> Cs<br>0 %<br>0 | <sup>56</sup> Ba<br>0.1 %<br>13 | <sup>57-71</sup> La's<br>61.3 %<br>8750 | <sup>72</sup> Hf<br>1.1 %<br>158 | <sup>73</sup> Ta<br>0 %<br>4   | <sup>74</sup> W<br>0 %<br>0   | <sup>75</sup> Re<br>0 %<br>0  | <sup>76</sup> Os<br>0 %<br>0     | <sup>77</sup> Ir<br>0 %<br>0    | <sup>78</sup> Pt<br>0 %<br>5     | <sup>79</sup> Au<br>0 %<br>0     | <sup>80</sup> Hg<br>0 %<br>1     | <sup>81</sup> Tl<br>0.8 %<br>119 | <sup>82</sup> Pb<br>0.1 %<br>11 | <sup>83</sup> Bi<br>2.8 %<br>404 | <sup>84</sup> Po<br>0.8 %<br>117 | <sup>85</sup> At<br>0 %<br>0   | <sup>86</sup> Rn<br>0 %<br>0   |
| <sup>87</sup> Fr<br>0 %<br>0 | <sup>88</sup> Ra<br>0 %<br>0    | <sup>89-103</sup> Ac's<br>5.6 %<br>799  | <sup>104</sup> Rf<br>0 %<br>0    | <sup>105</sup> Db<br>0 %<br>0  | <sup>106</sup> Sg<br>0 %<br>0 | <sup>107</sup> Bh<br>0 %<br>0 | <sup>108</sup> Hs<br>0 %<br>0    | <sup>109</sup> Mt<br>0 %<br>0   | <sup>110</sup> Ds<br>0 %<br>0    | <sup>111</sup> Rg<br>0 %<br>0    | <sup>112</sup> Cn<br>0 %<br>0    | <sup>113</sup> Uut<br>0 %<br>0   | <sup>114</sup> Fl<br>0 %<br>0   | <sup>115</sup> Uup<br>0 %<br>0   | <sup>116</sup> Lv<br>0 %<br>0    | <sup>117</sup> Uus<br>0 %<br>0 | <sup>118</sup> Uuo<br>0 %<br>0 |

|                                |                                   |                                  |                                  |                                   |                                 |                                  |                                   |                                  |                                  |                                |                                  |                                  |                                  |                                  |
|--------------------------------|-----------------------------------|----------------------------------|----------------------------------|-----------------------------------|---------------------------------|----------------------------------|-----------------------------------|----------------------------------|----------------------------------|--------------------------------|----------------------------------|----------------------------------|----------------------------------|----------------------------------|
| <sup>57</sup> La<br>0.2 %<br>4 | <sup>58</sup> Ce<br>7.3 %<br>1037 | <sup>59</sup> Pr<br>4.5 %<br>649 | <sup>60</sup> Nd<br>4.6 %<br>661 | <sup>61</sup> Pm<br>7.6 %<br>1090 | <sup>62</sup> Sm<br>0 %<br>0    | <sup>63</sup> Eu<br>3.3 %<br>464 | <sup>64</sup> Gd<br>7.1 %<br>1009 | <sup>65</sup> Tb<br>6.5 %<br>927 | <sup>66</sup> Dy<br>5.6 %<br>803 | <sup>67</sup> Ho<br>6 %<br>855 | <sup>68</sup> Er<br>1.9 %<br>265 | <sup>69</sup> Tm<br>3.4 %<br>483 | <sup>70</sup> Yb<br>0.7 %<br>102 | <sup>71</sup> Lu<br>2.6 %<br>373 |
| <sup>89</sup> Ac<br>0 %<br>6   | <sup>90</sup> Th<br>0 %<br>0      | <sup>91</sup> Pa<br>1.3 %<br>184 | <sup>92</sup> U<br>0 %<br>0      | <sup>93</sup> Np<br>4 %<br>566    | <sup>94</sup> Pu<br>0.1 %<br>20 | <sup>95</sup> Am<br>0.2 %<br>28  | <sup>96</sup> Cm<br>0 %<br>1      | <sup>97</sup> Rg<br>0 %<br>0     | <sup>98</sup> Cn<br>0 %<br>0     | <sup>99</sup> Uut<br>0 %<br>0  | <sup>100</sup> Fl<br>0 %<br>0    | <sup>101</sup> Uup<br>0 %<br>0   | <sup>102</sup> Lv<br>0 %<br>0    | <sup>103</sup> Uus<br>0 %<br>0   |

**Figure S4.** Schematic representation of the distribution of metals coordinated by a nitrate anion in a  $\eta^2$  fashion. The data represents 14,266  $\text{ONO}_2(\eta^2)\text{-M}$  structures found within 6,939 CIFs (NB: this deviates from the data in Figure S1 because the identity of M is not always given). The color code is meant as a guide to the eye, where red is the highest percentage of data and light blue the lowest.

| Coord. mode <sup>a</sup>                                                            | Interact. partner <sup>b</sup> | CIFs  | Hits   | $r \leq 1 \text{ \AA}$ | $n \leq \sum_{vdW} (\%)^c$ | Coord. mode <sup>a</sup>                                                              | Interact. partner <sup>b</sup> | CIFs  | Hits   | $r \leq 1 \text{ \AA}$ | $n \leq \sum_{vdW} (\%)^c$ |
|-------------------------------------------------------------------------------------|--------------------------------|-------|--------|------------------------|----------------------------|---------------------------------------------------------------------------------------|--------------------------------|-------|--------|------------------------|----------------------------|
| 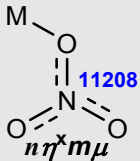   | EIR <sup>Tx</sup>              | 9,288 | 82,338 | 3,611                  | 456 (12.6%)                |                                                                                       |                                |       |        |                        |                            |
|                                                                                     | N <sup>Tx</sup>                | 7,621 | 32,200 | 1,328                  | 32 (2.4%)                  |                                                                                       |                                |       |        |                        |                            |
|                                                                                     | O <sup>Tx</sup>                | 7,971 | 45,859 | 2,933                  | 550 (18.8%)                |    | EIR <sup>Tx</sup>              | 5,649 | 48,395 | 2,399                  | 299 (12.5%)                |
|                                                                                     | F <sup>Tx</sup>                | 180   | 604    | 46                     | 7 (15.2%)                  |                                                                                       | RO <sup>T2H</sup>              | 830   | 1,876  | 115                    | 2 (1.7%)                   |
|                                                                                     | P <sup>Tx</sup>                | 247   | 416    | 7                      | 0                          |                                                                                       | R=O <sup>T1</sup>              | 3,443 | 9,493  | 874                    | 217 (24.8%)                |
|                                                                                     | S <sup>Tx</sup>                | 665   | 1,730  | 69                     | 0                          |    | EIR <sup>Tx</sup>              | 190   | 1,034  | 63                     | 16 (25.4%)                 |
|                                                                                     | Cl <sup>Tx</sup>               | 450   | 1,303  | 100                    | 1 (1.0%)                   |                                                                                       | RO <sup>T2H</sup>              | 10    | 22     | -                      | -                          |
|                                                                                     | As <sup>Tx</sup>               | 5     | 6      | 0                      | 0                          |                                                                                       | R=O <sup>T1</sup>              | 110   | 278    | 23                     | 10 (38.5%)                 |
|                                                                                     | Se <sup>Tx</sup>               | 13    | 27     | 1                      | 0                          |    | EIR <sup>Tx</sup>              | 415   | 2,457  | 165                    | 28 (17.0%)                 |
|                                                                                     | Br <sup>Tx</sup>               | 72    | 155    | 12                     | 0                          |                                                                                       | RO <sup>T2H</sup>              | 45    | 81     | -                      | -                          |
|                                                                                     | I <sup>Tx</sup>                | 14    | 38     | 2                      | 0                          |                                                                                       | R=O <sup>T1</sup>              | 254   | 611    | 56                     | 17 (30.4%)                 |
|                                                                                     | R=O <sup>Tx</sup>              | 6,285 | 20,614 | 1,777                  | 422 (23.7%)                |    | EIR <sup>Tx</sup>              | 97    | 559    | 29                     | 4 (13.8%)                  |
|                                                                                     | R=O <sup>T1</sup>              | 5,902 | 18,029 | 1,680                  | 406 (24.2%)                |                                                                                       | RO <sup>T2H</sup>              | 9     | 12     | -                      | -                          |
|                                                                                     | RO <sup>TxH</sup>              | 2,416 | 5,998  | 236                    | 11 (4.7%)                  |                                                                                       | R=O <sup>T1</sup>              | 48    | 110    | -                      | -                          |
|                                                                                     | RO <sup>T2H</sup>              | 1,354 | 3,075  | 188                    | 9 (4.8%)                   |   | EIR <sup>Tx</sup>              | 86    | 499    | 26                     | 5 (19.0%)                  |
|                                                                                     | H <sub>2</sub> O <sup>Tx</sup> | 1,418 | 3,443  | 105                    | 7 (6.7%)                   |                                                                                       | RO <sup>T2H</sup>              | 6     | 13     | -                      | -                          |
|                                                                                     | H <sub>2</sub> O <sup>T2</sup> | 633   | 1,486  | 73                     | 6 (8.2%)                   |                                                                                       | R=O <sup>T1</sup>              | 49    | 103    | -                      | -                          |
|  | EIR <sup>Tx</sup>              | 3,231 | 24,943 | 1,567                  | 118 (11.6%)                |  | EIR <sup>Tx</sup>              | 41    | 253    | 19                     | 5 (26.3%)                  |
|                                                                                     | RO <sup>T2H</sup>              | 471   | 870    | 40                     | 2 (5%)                     |                                                                                       | RO <sup>T2H</sup>              | 1     | 2      | -                      | -                          |
|                                                                                     | R=O <sup>T1</sup>              | 2,136 | 6,319  | 596                    | 126 (21.1%)                |                                                                                       | R=O <sup>T1</sup>              | 27    | 80     | -                      | -                          |

**Table S1.** Numerical overview of searches performed for different coordination modes of a nitrate anions where an interacting partner has an intermolecular distance  $\leq 5 \text{ \AA}$  from the NO<sub>3</sub><sup>-</sup> N-atom. The entries highlighted in red are also shown in Table 1. <sup>a</sup>See also Figure S1 for structures; M = any metal and the number in blue indicates the number of CIFs found for that coordination mode. <sup>b</sup>The interacting partner considered in the search where R can be any atom and EIR can be N, P, As, O, S, Se, Te, F, Cl, Br, I, or At. The superscripts 'T1/T2/Tx' indicate the number of bonded atoms set in the ConQuest search where x means this was left unspecified. <sup>c</sup>The number of hits (also expressed as percentage) found within  $r \leq 1 \text{ \AA}$  where the interacting atom and the nitrate's N-atom are within each other's van der Waals radii.



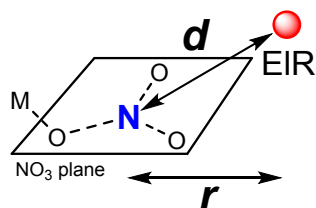

**Figure S5.** Simplified schematic of the most general query used, which contains all of the data in Table S1. The intermolecular N...EIR distance ( $d$ ) was always set to  $\leq 5$  Å and the parallel displacement parameter ( $r$ , i.e. the radial displacement from N, parallel to the  $\text{NO}_3$  plane) was derived from  $d$  and several other measurements. M = any metal, EIR = N, P, As, O, S, Se, Te, F, Cl, Br, I, or At. The bonds shown as dashed lines were set as any type of bond.

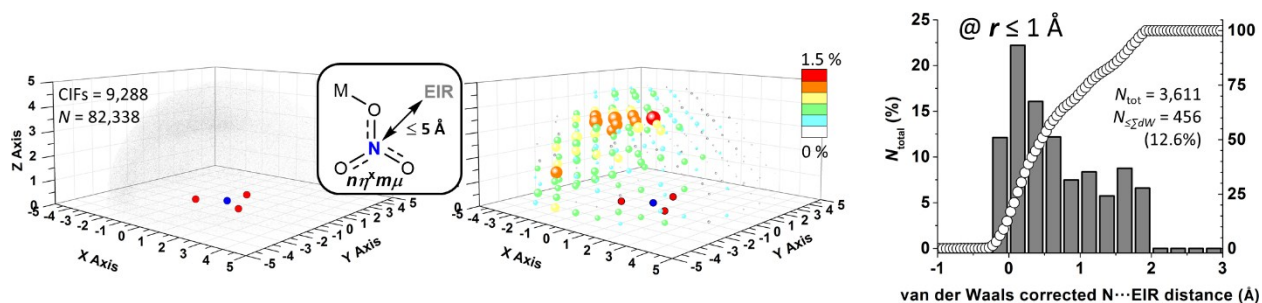

**Figure S6.** Three dimensional scatter plot (left) and four dimensional density plot (middle) for the most general dataset of  $n\eta^x m\mu$  nitrate $^{\text{N}}\cdots\text{EIR}$  (see also inset figure). The data characterized by a parallel displacement parameter ( $r$ ) of  $\leq 1$  Å was plotted as a function of the van der Waals corrected N...EIR distance (right) in both absolute (grey bars with left-hand scale) and cumulative percentages (open circles with right-hand scale).

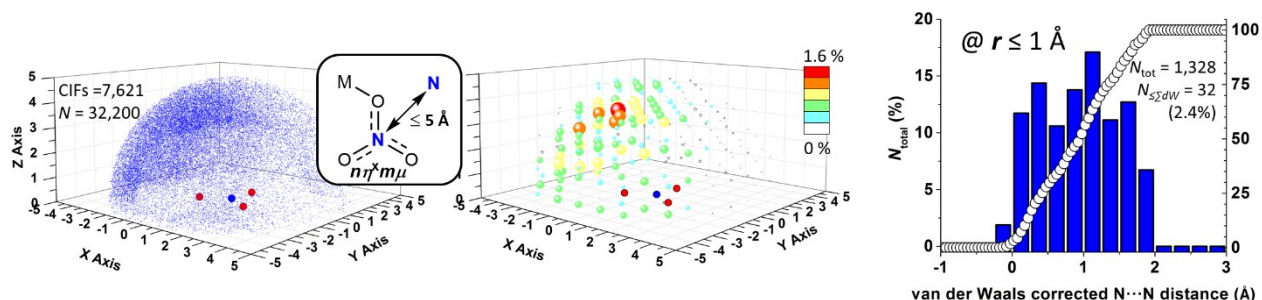

**Figure S7.** Three dimensional scatter plot (left) and four dimensional density plot (middle) for the dataset of  $n\eta^x m\mu$  nitrate $^{\text{N}}\cdots\text{N}$  (see also inset figure). The data characterized by a parallel displacement parameter ( $r$ ) of  $\leq 1$  Å was plotted as a function of the van der Waals corrected N...N distance (right) in both absolute (blue bars with left-hand scale) and cumulative percentages (open circles with right-hand scale).

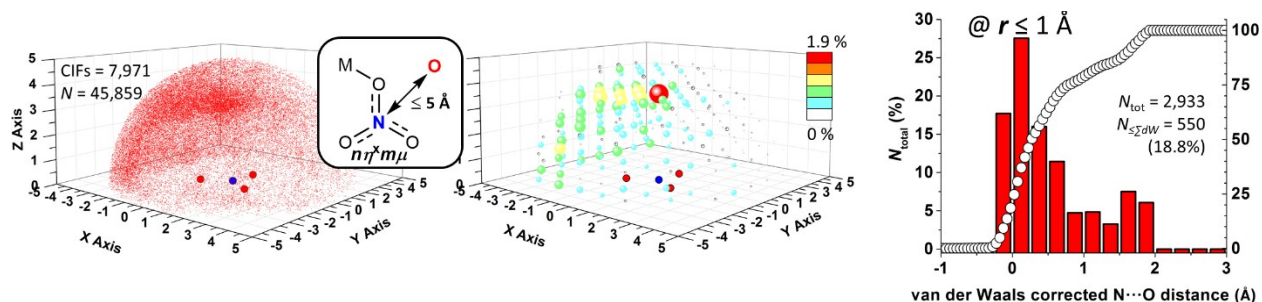

**Figure S8.** Three dimensional scatter plot (left) and four dimensional density plot (middle) for the dataset of  $nn^x m \mu$  nitrate<sup>N...O</sup> (see also inset figure). The data characterized by a parallel displacement parameter ( $r$ ) of  $\leq 1$  Å was plotted as a function of the van der Waals corrected N...O distance (right) in both absolute (red bars with left-hand scale) and cumulative percentages (open circles with right-hand scale).

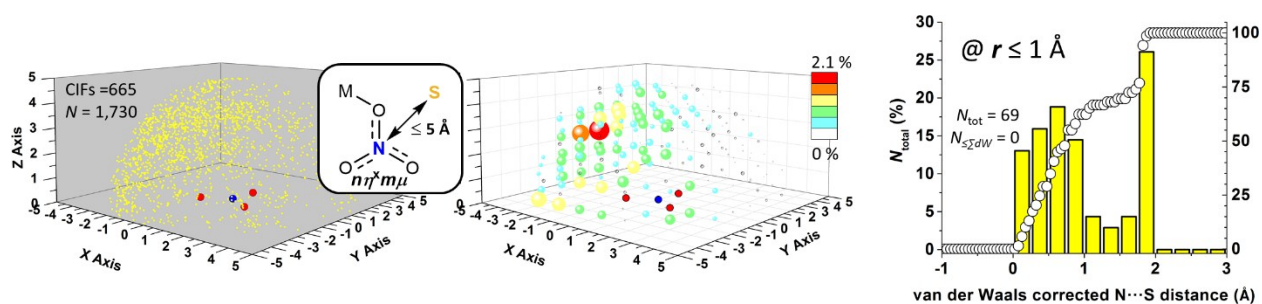

**Figure S9.** Three dimensional scatter plot (left) and four dimensional density plot (middle) for the dataset of  $nn^x m \mu$  nitrate<sup>N...S</sup> (see also inset figure). The data characterized by a parallel displacement parameter ( $r$ ) of  $\leq 1$  Å was plotted as a function of the van der Waals corrected N...S distance (right) in both absolute (yellow bars with left-hand scale) and cumulative percentages (open circles with right-hand scale).

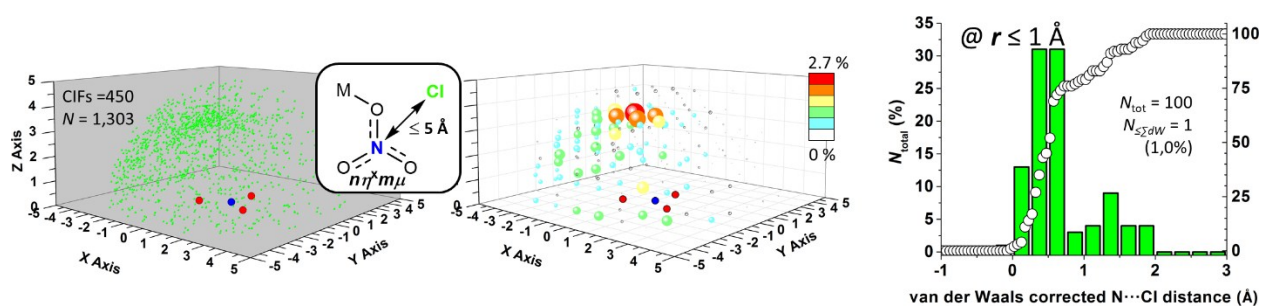

**Figure S10.** Three dimensional scatter plot (left) and four dimensional density plot (middle) for the dataset of  $nn^x m \mu$  nitrate<sup>N...Cl</sup> (see also inset figure). The data characterized by a parallel displacement parameter ( $r$ ) of  $\leq 1$  Å was plotted as a function of the van der Waals corrected N...Cl distance (right) in both absolute (green bars with left-hand scale) and cumulative percentages (open circles with right-hand scale).

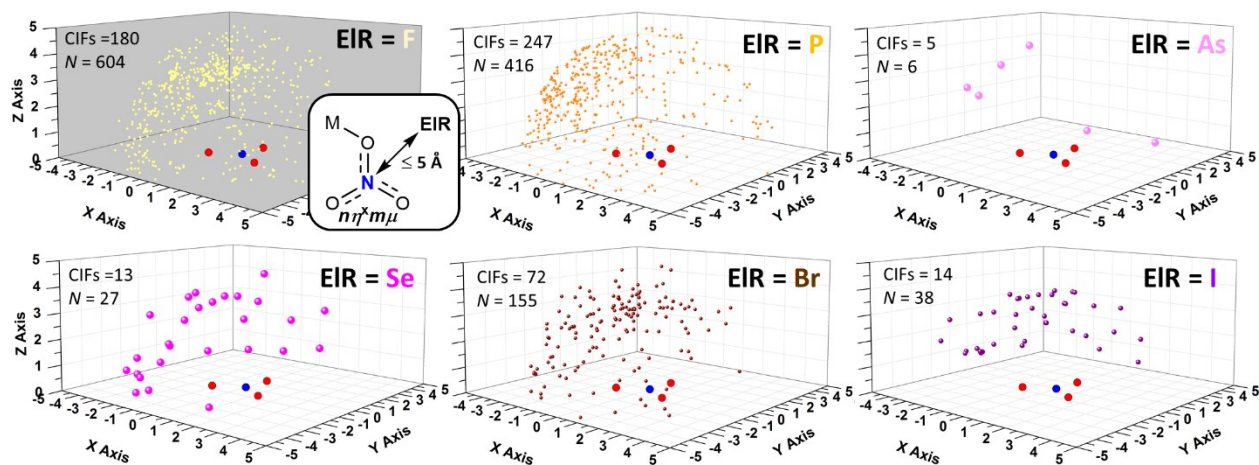

**Figure S11.** Three dimensional scatter plots for various  $nn^*m\mu$  nitrate<sup>N</sup>...EIR (see also inset figure) where EIR = F, P, As, Se, Br or I. Other plots (i.e.  $4D/N(r)$ ) were not generated because there were not enough hits (maximum of 604 for EIR = F). The number of data involved in van der Waals overlap at  $r \leq 1 \text{ \AA}$  is given in Table S1.

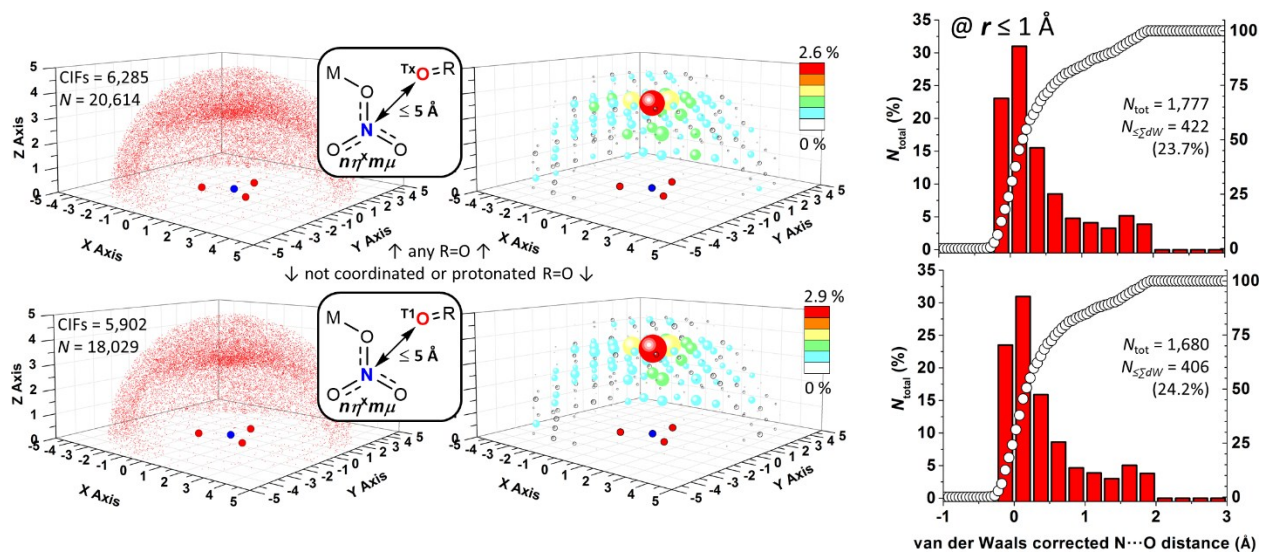

**Figure S12.** Three dimensional scatter plots (left) and four dimensional density plots (middle) for the datasets of  $nn^*m\mu$  nitrate<sup>N</sup>...O=R (see also inset figure, R = any atom). The data characterized by a parallel displacement parameter ( $r$ ) of  $\leq 1 \text{ \AA}$  was plotted as a function of the van der Waals corrected N...O distance (right) in both absolute (red bars with left-hand scale) and cumulative percentages (open circles with right-hand scale). The plots on the top represent any type of interacting R=O Oxygen atoms (indicated by 'Tx'), while the bottom plots concern only uncoordinated / unprotonated such O-atoms (indicated by 'T1').



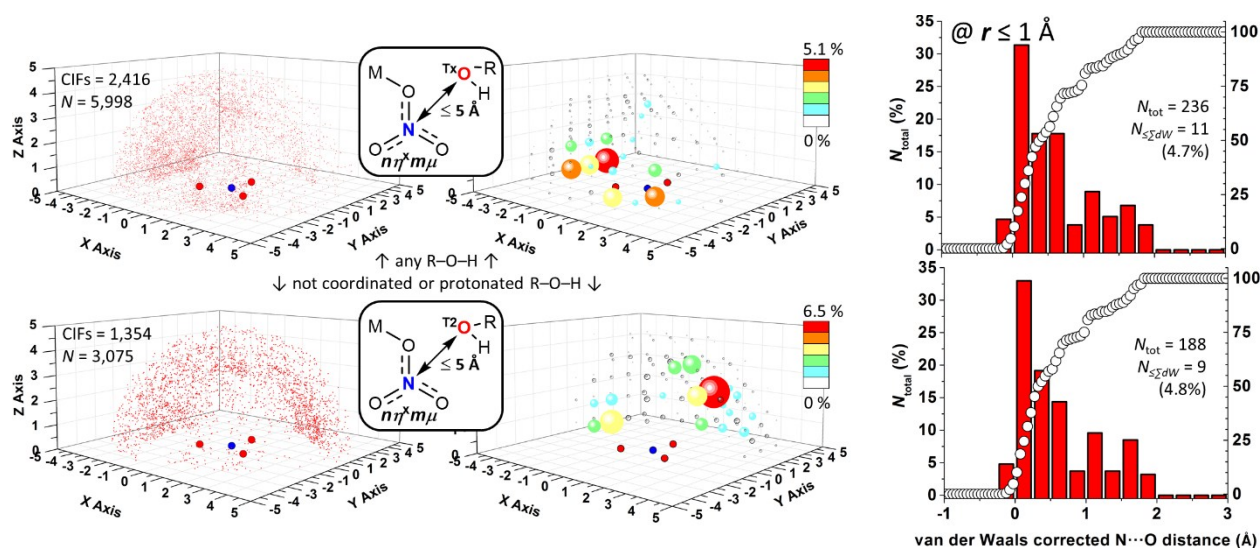

**Figure S13.** Three dimensional scatter plots (left) and four dimensional density plots (middle) for the datasets of  $nnxm\mu$  nitrate<sup>N</sup>...OHR (see also inset figure, R = any atom). The data characterized by a parallel displacement parameter ( $r$ ) of  $\leq 1$  Å was plotted as a function of the van der Waals corrected N...O distance (right) in both absolute (red bars with left-hand scale) and cumulative percentages (open circles with right-hand scale). The plots on the top represent any type of interacting ROH Oxygen atoms (indicated by 'Tx'), while the bottom plots concern only uncoordinated / unprotonated such O-atoms (indicated by 'T2').

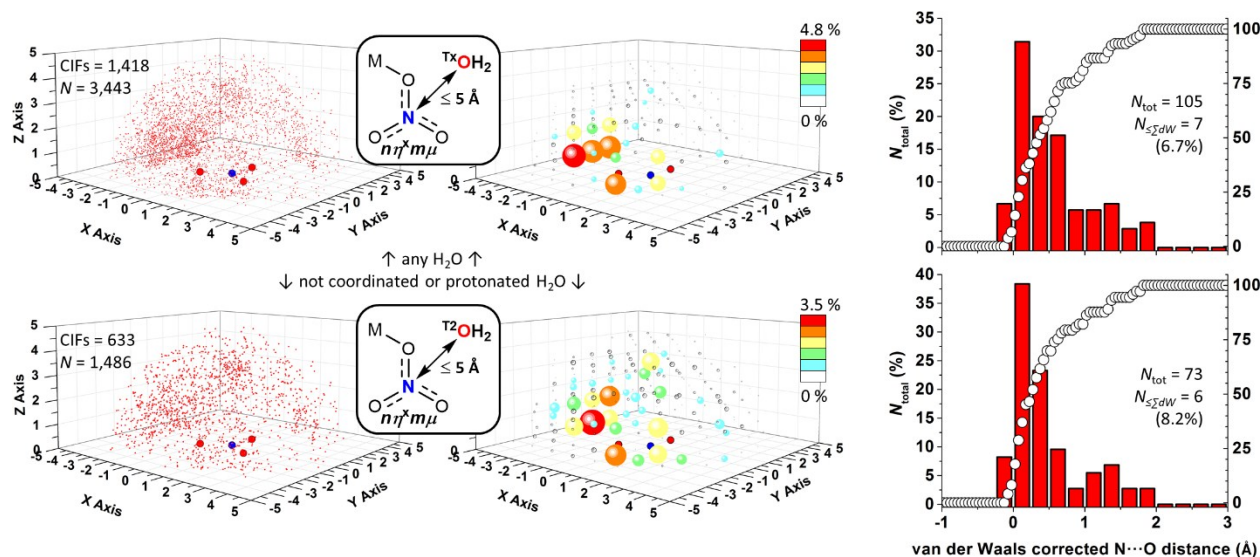

**Figure S14.** Three dimensional scatter plots (left) and four dimensional density plots (middle) for the datasets of  $nnxm\mu$  nitrate<sup>N</sup>...OH<sub>2</sub> (see also inset figure, R = any atom). The data characterized by a parallel displacement parameter ( $r$ ) of  $\leq 1$  Å was plotted as a function of the van der Waals corrected N...O distance (right) in both absolute (red bars with left-hand scale) and cumulative percentages (open circles with right-hand scale). The plots on the top represent any type of interacting OH<sub>2</sub> Oxygen atoms (indicated by 'Tx'), while the bottom plots concern only uncoordinated / unprotonated such O-atoms (indicated by 'T2').

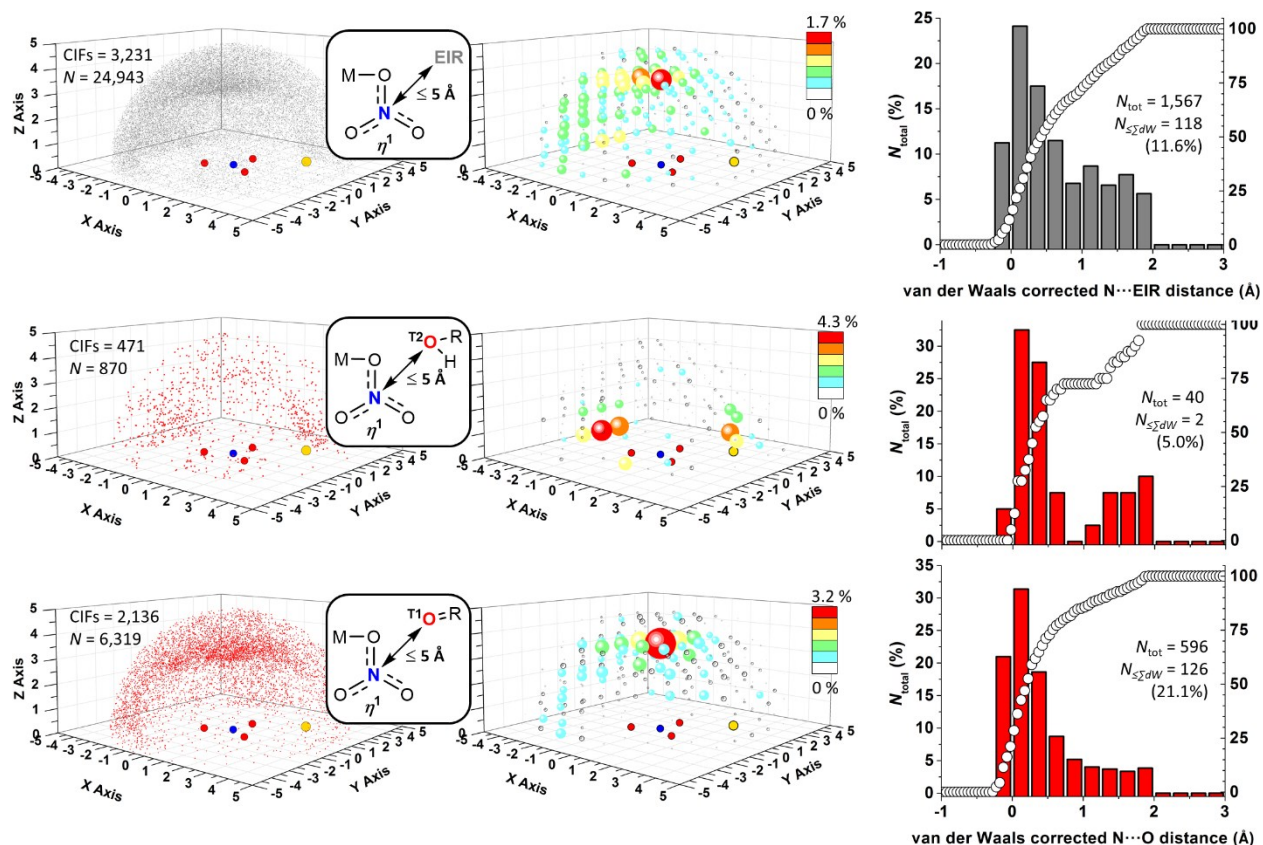

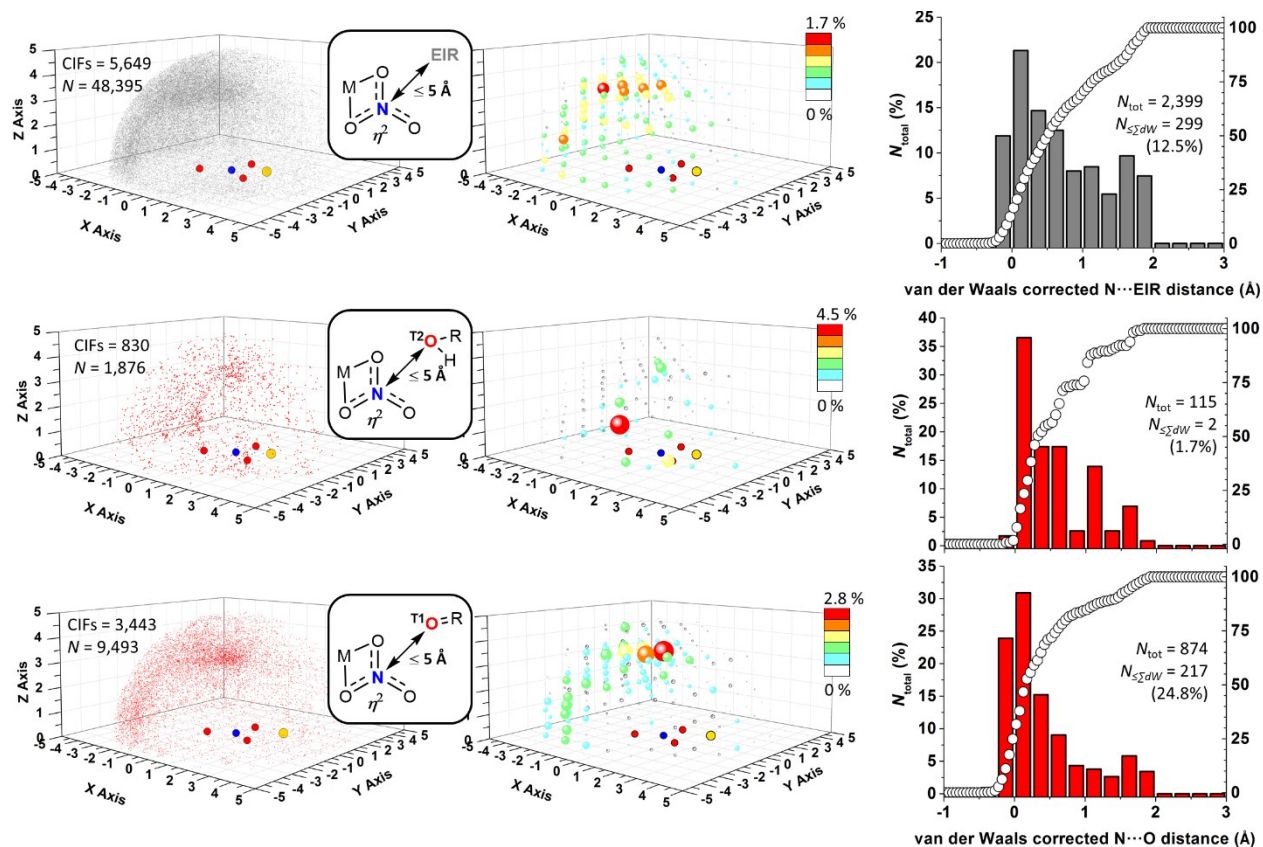

**Figure S16.** Three dimensional scatter plots (left) and four dimensional density plots (middle) for the datasets of  $\eta^2$  nitrate $\cdots$ EIR (top) /  $\cdots$ ORH (middle) /  $\cdots$ O=R (bottom); see also inset figures (R = any atom, EIR = N, P, As, O, S, Se, Te, F, Cl, Br, I or At). The data characterized by a parallel displacement parameter ( $r$ ) of  $\leq 1$  Å was plotted as a function of the van der Waals corrected N $\cdots$ EIR/O distance (right) in both absolute (bars with left-hand scale) and cumulative percentages (open circles with right-hand scale). The plots concerning 'EIR' represent any type of interacting electron rich atom, while the bottom plots with ORH and O=R concern only uncoordinated / unprotonated such O-atoms (indicated by 'T1/T2').



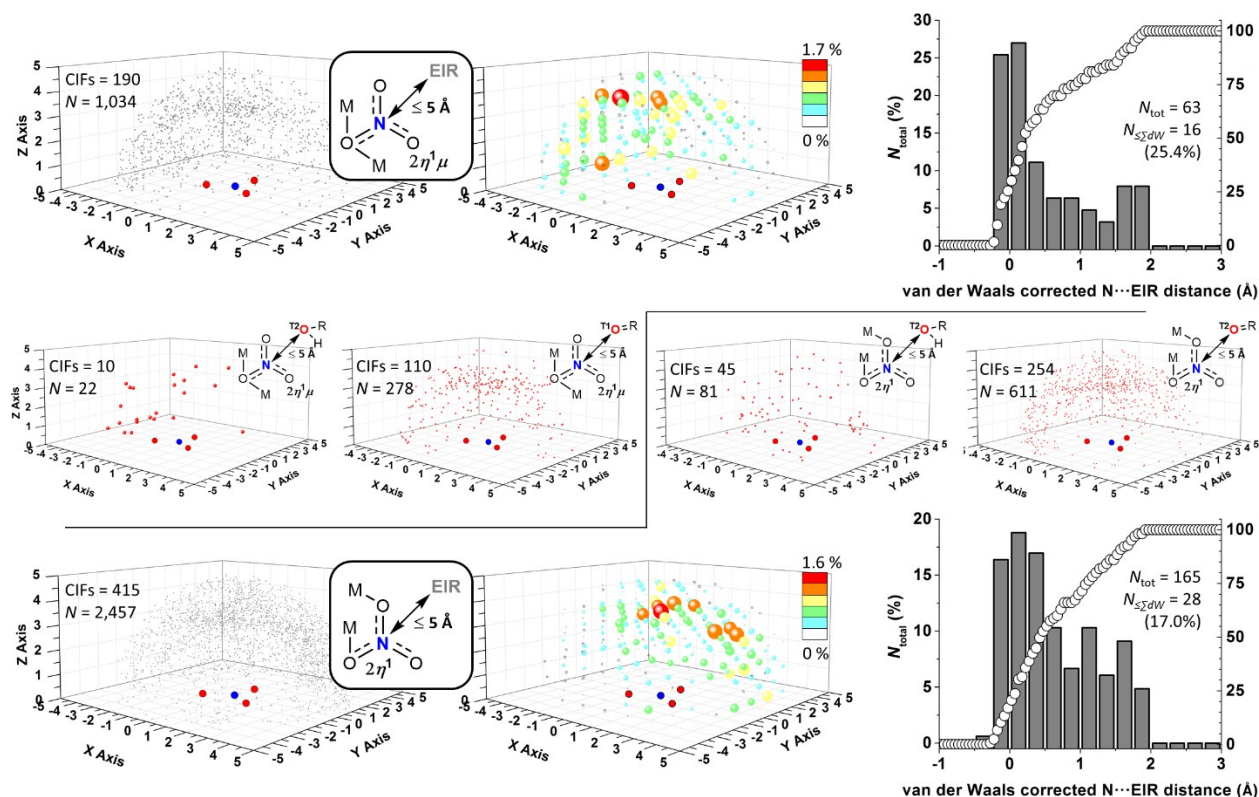

**Figure S17.** Three dimensional scatter plot (top left) and four dimensional density plot (top middle) for the dataset with  $2\eta^1\mu$  nitrate<sup>N</sup>...EIR (see also inset figure). Data characterized by a parallel displacement parameter ( $r$ ) of  $\leq 1$  Å was plotted as a function of the van der Waals corrected N...EIR distance (top right) in both absolute (grey bars with left-hand scale) and cumulative percentages (open circles with right-hand scale). The three dimensional scatter plots are also given for  $2\eta^1\mu$  nitrate<sup>N</sup>...OHR and  $2\eta^1\mu$  nitrate<sup>N</sup> (center left, see also inset figures). The same plots are given for the dataset with  $2\eta^1$  nitrate<sup>N</sup> in the bottom (3D/4D/ $N(r)$  plots for EIR) and center right of the figure (3D plots for OHR and O=R). The plots concerning 'EIR' represent any type of interacting electron rich atom, while the plots with OHR and O=R concern only uncoordinated / unprotonated such O-atoms (indicated by 'T1/T2'). R = any atom and EIR = N, P, As, O, S, Se, Te, F, Cl, Br, I or At.

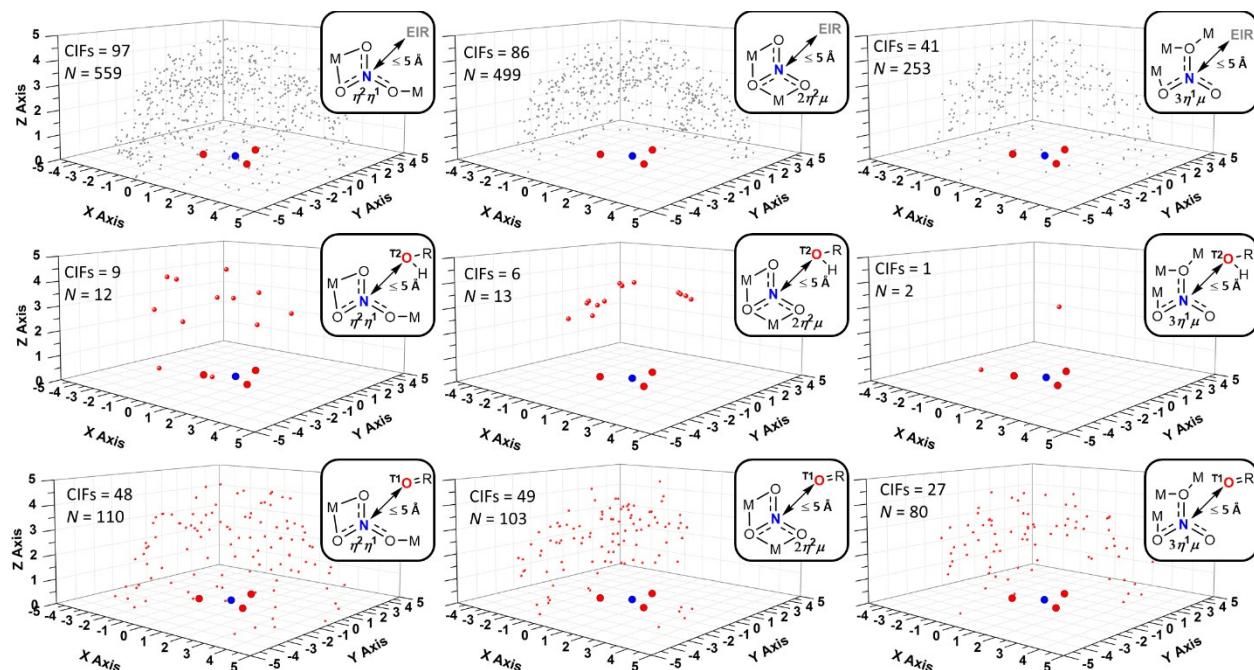

**Figure S18.** Three dimensional scatter plots of  $\eta^2\eta^1$  (left),  $2\eta^2\mu$  (middle) and  $3\eta^1\mu$  (right) nitrate surrounded by EIR (top) OHR (middle) or O=R (bottom) moieties. Other plots (i.e. 4D/ $N(r)$ ) were not generated because there were not enough hits (maximum of 559 for  $\eta^2\eta^1$  nitrate $N\cdots$ EIR). The number of data involved in van der Waals overlap at  $r \leq 1$  Å for each nitrate coordination mode with any electron rich atoms is given in Table S1. The plots concerning 'EIR' represent any type of interacting electron rich atom, while the plots with OHR and O=R concern only uncoordinated / unprotonated such O-atoms (indicated by 'T1/T2'). R = any atom and EIR = N, P, As, O, S, Se, Te, F, Cl, Br, I or At.



**Table S2.** Overview of the 406 close contacts found within the CSD wherein an sp<sup>2</sup>-hybridized O-atom is in close proximity to any coordinated nitrate anion's N-atom with a van der Waals corrected O...N distance (vdW) below 0 Å and a parallel displacement parameter (*r*) below 1 Å.

| vdW    | <i>r</i> | Refcode  | sp <sup>2</sup> -O | vdW    | <i>r</i> | Refcode  | sp <sup>2</sup> -O | vdW    | <i>r</i> | Refcode  | sp <sup>2</sup> -O |
|--------|----------|----------|--------------------|--------|----------|----------|--------------------|--------|----------|----------|--------------------|
| -0.022 | 0.431    | KIJYIM01 | Ag=O               | -0.165 | 0.578    | QAWSEO   | NO <sub>3</sub>    | -0.069 | 0.690    | GEZXOA   | NO <sub>3</sub>    |
| -0.143 | 0.268    | COJHAK10 | Np=O               | -0.164 | 0.116    | UHECAL   | NO <sub>3</sub>    | -0.068 | 0.139    | BACNUQ   | NO <sub>3</sub>    |
| -0.093 | 0.940    | BAXQOI   | U=O                | -0.164 | 0.698    | ADCDNO10 | NO <sub>3</sub>    | -0.068 | 0.647    | RIDTAZ   | NO <sub>3</sub>    |
| -0.227 | 0.139    | BOFVAV   | U=O                | -0.163 | 0.349    | RIQQOZ   | NO <sub>3</sub>    | -0.067 | 0.536    | OPASEF   | NO <sub>3</sub>    |
| -0.208 | 0.716    | BOTYIS   | U=O                | -0.163 | 0.603    | ETULIP   | NO <sub>3</sub>    | -0.066 | 0.269    | NUNYUR   | NO <sub>3</sub>    |
| -0.134 | 0.562    | BOTYIS   | U=O                | -0.162 | 0.467    | GOFYIJ   | NO <sub>3</sub>    | -0.066 | 0.435    | WIJVES   | NO <sub>3</sub>    |
| -0.152 | 0.280    | COJGUD10 | U=O                | -0.156 | 0.817    | PUBWIT   | NO <sub>3</sub>    | -0.066 | 0.450    | OFEWIH   | NO <sub>3</sub>    |
| -0.130 | 0.483    | DACCUI   | U=O                | -0.154 | 0.397    | QOZWOR   | NO <sub>3</sub>    | -0.066 | 0.672    | HAVLUN   | NO <sub>3</sub>    |
| -0.074 | 0.554    | DACCUI   | U=O                | -0.150 | 0.361    | NEXQIR   | NO <sub>3</sub>    | -0.066 | 0.703    | IDILUE   | NO <sub>3</sub>    |
| -0.086 | 0.347    | DACDAP   | U=O                | -0.150 | 0.697    | FEZLIF   | NO <sub>3</sub>    | -0.066 | 0.731    | BURSOY   | NO <sub>3</sub>    |
| -0.134 | 0.319    | DEBRUZ   | U=O                | -0.150 | 0.932    | LAMCIM   | NO <sub>3</sub>    | -0.064 | 0.650    | IWURAU   | NO <sub>3</sub>    |
| -0.132 | 0.761    | FAGNIL   | U=O                | -0.148 | 0.354    | JAJYAV   | NO <sub>3</sub>    | -0.064 | 0.929    | LECWAS   | NO <sub>3</sub>    |
| -0.091 | 0.867    | FAGNIL   | U=O                | -0.148 | 0.492    | LAVSOR01 | NO <sub>3</sub>    | -0.063 | 0.702    | HAVMEY   | NO <sub>3</sub>    |
| -0.208 | 0.289    | FISHIY   | U=O                | -0.148 | 0.577    | BORNAG   | NO <sub>3</sub>    | -0.062 | 0.124    | JOLLEB   | NO <sub>3</sub>    |
| -0.173 | 0.141    | FISHIY   | U=O                | -0.147 | 0.470    | IWUVIF   | NO <sub>3</sub>    | -0.062 | 0.345    | TIMJAA01 | NO <sub>3</sub>    |
| -0.223 | 0.112    | GIMSEC   | U=O                | -0.146 | 0.610    | YUCXAW   | NO <sub>3</sub>    | -0.062 | 0.359    | OFEWIH   | NO <sub>3</sub>    |
| -0.167 | 0.205    | GOXGUX   | U=O                | -0.145 | 0.349    | CIJRAQ   | NO <sub>3</sub>    | -0.061 | 0.459    | OFEWIH01 | NO <sub>3</sub>    |
| -0.125 | 0.239    | GOXGUX   | U=O                | -0.144 | 0.433    | PIRDOL   | NO <sub>3</sub>    | -0.061 | 0.522    | QOGRAG   | NO <sub>3</sub>    |
| -0.049 | 0.346    | IPIJEX   | U=O                | -0.143 | 0.636    | UQEMAF   | NO <sub>3</sub>    | -0.060 | 0.288    | MEHHIS   | NO <sub>3</sub>    |
| -0.146 | 0.675    | IXULIW   | U=O                | -0.143 | 0.987    | EKAZOG   | NO <sub>3</sub>    | -0.059 | 0.475    | QOZSUT   | NO <sub>3</sub>    |
| -0.034 | 0.963    | IXULIW   | U=O                | -0.141 | 0.282    | WIJVOC   | NO <sub>3</sub>    | -0.059 | 0.854    | CIZGAV   | NO <sub>3</sub>    |
| -0.201 | 0.582    | IXULOC   | U=O                | -0.137 | 0.257    | LAVSOR01 | NO <sub>3</sub>    | -0.059 | 0.955    | VOSPIE   | NO <sub>3</sub>    |
| -0.167 | 0.756    | IXULOC   | U=O                | -0.137 | 0.457    | VIZYIM   | NO <sub>3</sub>    | -0.058 | 0.371    | OFEWIH01 | NO <sub>3</sub>    |
| -0.091 | 0.558    | IXULOC   | U=O                | -0.136 | 0.190    | CANCEZ   | NO <sub>3</sub>    | -0.058 | 0.573    | YATVIA   | NO <sub>3</sub>    |
| -0.087 | 0.485    | LAJYIH   | U=O                | -0.136 | 0.360    | AFIWOC   | NO <sub>3</sub>    | -0.058 | 0.674    | GEZXUG   | NO <sub>3</sub>    |
| -0.065 | 0.841    | LURBAC   | U=O                | -0.136 | 0.525    | MABQOX   | NO <sub>3</sub>    | -0.058 | 0.746    | XAYTUN   | NO <sub>3</sub>    |
| -0.078 | 0.048    | MIDXAY   | U=O                | -0.135 | 0.310    | OLUZUS   | NO <sub>3</sub>    | -0.058 | 0.964    | LAVSOR   | NO <sub>3</sub>    |
| -0.170 | 0.691    | PIDJAP   | U=O                | -0.135 | 0.448    | ITOMEL   | NO <sub>3</sub>    | -0.057 | 0.434    | AXUYEY   | NO <sub>3</sub>    |
| -0.152 | 0.418    | PIDJAP   | U=O                | -0.135 | 0.470    | LECWOG   | NO <sub>3</sub>    | -0.057 | 0.659    | QAVVOY   | NO <sub>3</sub>    |
| -0.152 | 0.789    | RUGGAC   | U=O                | -0.135 | 0.481    | CAQFUV   | NO <sub>3</sub>    | -0.057 | 0.907    | QEPLAA   | NO <sub>3</sub>    |
| -0.175 | 0.322    | RUWBER   | U=O                | -0.135 | 0.513    | LECYAU   | NO <sub>3</sub>    | -0.056 | 0.255    | QAQNON   | NO <sub>3</sub>    |
| -0.237 | 0.389    | RUWBIV   | U=O                | -0.135 | 0.556    | IWUROI   | NO <sub>3</sub>    | -0.056 | 0.381    | ELIQUM   | NO <sub>3</sub>    |
| -0.148 | 0.264    | SENMUT   | U=O                | -0.134 | 0.086    | FUWDOS   | NO <sub>3</sub>    | -0.055 | 0.496    | OHIXIO   | NO <sub>3</sub>    |
| -0.020 | 0.101    | SENMUT   | U=O                | -0.134 | 0.351    | AZEXIM   | NO <sub>3</sub>    | -0.055 | 0.504    | XEQYID   | NO <sub>3</sub>    |
| -0.281 | 0.258    | UYENIW   | U=O                | -0.133 | 0.807    | EGUMEA01 | NO <sub>3</sub>    | -0.055 | 0.904    | BOPJUM   | NO <sub>3</sub>    |
| -0.052 | 0.633    | VOSPUQ   | U=O                | -0.132 | 0.438    | FAWKUJ   | NO <sub>3</sub>    | -0.054 | 0.216    | TUMHAM   | NO <sub>3</sub>    |
| -0.211 | 0.132    | WIJVES   | U=O                | -0.132 | 0.759    | QOYDIR   | NO <sub>3</sub>    | -0.054 | 0.795    | KUPLUD   | NO <sub>3</sub>    |
| -0.197 | 0.425    | WIJVES   | U=O                | -0.132 | 0.993    | CINXOM   | NO <sub>3</sub>    | -0.054 | 0.874    | QEPLLE   | NO <sub>3</sub>    |

|        |       |          |                        |        |       |          |                 |        |       |          |                 |
|--------|-------|----------|------------------------|--------|-------|----------|-----------------|--------|-------|----------|-----------------|
| -0.144 | 0.395 | WIJVES   | U=O                    | -0.131 | 0.981 | VIZYIM   | NO <sub>3</sub> | -0.054 | 0.961 | HERWAC   | NO <sub>3</sub> |
| -0.117 | 0.937 | XEPXUM   | U=O                    | -0.130 | 0.450 | ATOCIV01 | NO <sub>3</sub> | -0.053 | 0.174 | WUNFAM02 | NO <sub>3</sub> |
| -0.079 | 0.566 | XEPXUM   | U=O                    | -0.129 | 0.086 | SEFNIB   | NO <sub>3</sub> | -0.053 | 0.260 | WIYHIV   | NO <sub>3</sub> |
| -0.087 | 0.493 | XUGJIU   | U=O                    | -0.129 | 0.326 | AXIRIEE  | NO <sub>3</sub> | -0.053 | 0.349 | TIMJAA   | NO <sub>3</sub> |
| -0.220 | 0.117 | UTIPAQ   | C=O                    | -0.129 | 0.734 | UXIHEQ   | NO <sub>3</sub> | -0.052 | 0.604 | AFEGEY01 | NO <sub>3</sub> |
| -0.198 | 0.179 | TEPNOT   | C=O                    | -0.128 | 0.345 | ZOQGOB   | NO <sub>3</sub> | -0.051 | 0.054 | LABWEQ   | NO <sub>3</sub> |
| -0.179 | 0.227 | TEPNUZ   | C=O                    | -0.128 | 0.402 | WADMOE   | NO <sub>3</sub> | -0.050 | 0.226 | BACPAY   | NO <sub>3</sub> |
| -0.161 | 0.207 | TEPPAH   | C=O                    | -0.128 | 0.786 | EGUMEA02 | NO <sub>3</sub> | -0.050 | 0.269 | KIPYIT   | NO <sub>3</sub> |
| -0.144 | 0.422 | SIDVIL   | C=O                    | -0.128 | 0.905 | LAMCOS   | NO <sub>3</sub> | -0.048 | 0.675 | HAYZOY   | NO <sub>3</sub> |
| -0.110 | 0.216 | GEBKUT   | C=O                    | -0.127 | 0.075 | VUKWIJ   | NO <sub>3</sub> | -0.046 | 0.227 | NAFDUU01 | NO <sub>3</sub> |
| -0.076 | 0.765 | EJEWUM   | C=O                    | -0.127 | 0.619 | TOKZOI   | NO <sub>3</sub> | -0.045 | 0.632 | FELYAW   | NO <sub>3</sub> |
| -0.075 | 0.460 | FINLEV   | C=O                    | -0.127 | 0.636 | RUMPIY   | NO <sub>3</sub> | -0.045 | 0.817 | FOCREU   | NO <sub>3</sub> |
| -0.041 | 0.167 | FIVHAV   | C=O                    | -0.126 | 0.813 | NUYMEA   | NO <sub>3</sub> | -0.044 | 0.496 | QOZWUX   | NO <sub>3</sub> |
| -0.041 | 0.917 | UYAQUI   | C=O                    | -0.126 | 0.907 | LAMCEI   | NO <sub>3</sub> | -0.043 | 0.179 | XEPXUM   | NO <sub>3</sub> |
| -0.147 | 0.395 | IPASOH   | C=O                    | -0.125 | 0.807 | EGUMEA03 | NO <sub>3</sub> | -0.042 | 0.669 | HAVLEX   | NO <sub>3</sub> |
| -0.113 | 0.627 | YUVPOV   | <b>C=O<sup>a</sup></b> | -0.124 | 0.200 | TIGGUN   | NO <sub>3</sub> | -0.041 | 0.564 | JIQYOY   | NO <sub>3</sub> |
| -0.298 | 0.715 | NUSKAO   | R-NO <sub>2</sub>      | -0.124 | 0.273 | ATOHUM   | NO <sub>3</sub> | -0.041 | 0.590 | YEBNAV   | NO <sub>3</sub> |
| -0.211 | 0.756 | PITHEH   | R-NO <sub>2</sub>      | -0.124 | 0.967 | LEWDIC   | NO <sub>3</sub> | -0.040 | 0.374 | VOWKEZ   | NO <sub>3</sub> |
| -0.188 | 0.490 | NUSJUH   | R-NO <sub>2</sub>      | -0.124 | 0.997 | XUGJIU   | NO <sub>3</sub> | -0.040 | 0.651 | UQEYEW   | NO <sub>3</sub> |
| -0.178 | 0.502 | OQIKIJ   | R-NO <sub>2</sub>      | -0.121 | 0.337 | QOCYAI   | NO <sub>3</sub> | -0.040 | 0.685 | LACDEY   | NO <sub>3</sub> |
| -0.118 | 0.618 | WECVUX   | R-NO <sub>2</sub>      | -0.120 | 0.611 | WAKNIH   | NO <sub>3</sub> | -0.040 | 0.846 | GOCLOA   | NO <sub>3</sub> |
| -0.275 | 0.426 | YIKXEV   | Cl=O                   | -0.120 | 0.983 | YONPOI   | NO <sub>3</sub> | -0.039 | 0.675 | EQUONIO  | NO <sub>3</sub> |
| -0.014 | 0.429 | NEVHIH   | Cl=O                   | -0.119 | 0.802 | EGUMEA   | NO <sub>3</sub> | -0.039 | 0.905 | CIZGEZ   | NO <sub>3</sub> |
| -0.106 | 0.592 | YONPUO   | <b>S=O<sup>b</sup></b> | -0.118 | 0.955 | TUZLAB   | NO <sub>3</sub> | -0.039 | 0.940 | LAJXOK   | NO <sub>3</sub> |
| -0.202 | 0.111 | XAFFAM01 | Re-N=O                 | -0.117 | 0.063 | WOZXIS   | NO <sub>3</sub> | -0.037 | 0.337 | CAKSUD   | NO <sub>3</sub> |
| -0.016 | 0.513 | YUWWAO   | NO <sub>3</sub>        | -0.117 | 0.196 | DAPCUN02 | NO <sub>3</sub> | -0.037 | 0.834 | WEPKOR   | NO <sub>3</sub> |
| -0.068 | 0.242 | UVITUQ   | NO <sub>3</sub>        | -0.117 | 0.403 | PITHEH   | NO <sub>3</sub> | -0.036 | 0.495 | SUMGIR   | NO <sub>3</sub> |
| -0.226 | 0.453 | WIJVES   | NO <sub>3</sub>        | -0.117 | 0.502 | PAZMOT   | NO <sub>3</sub> | -0.035 | 0.369 | TANYIR   | NO <sub>3</sub> |
| -2.247 | 0.532 | GUVJAK   | NO <sub>3</sub>        | -0.117 | 0.687 | YIYBEP   | NO <sub>3</sub> | -0.035 | 0.601 | LUKQOY   | NO <sub>3</sub> |
| -0.385 | 0.968 | SICCOX   | NO <sub>3</sub>        | -0.117 | 0.803 | CEPMAM01 | NO <sub>3</sub> | -0.035 | 0.646 | UQEYEW   | NO <sub>3</sub> |
| -0.358 | 0.988 | CUMYAM   | NO <sub>3</sub>        | -0.117 | 0.925 | FOGGUF   | NO <sub>3</sub> | -0.034 | 0.393 | DIGLOV   | NO <sub>3</sub> |
| -0.307 | 0.187 | FETYEK   | NO <sub>3</sub>        | -0.116 | 0.277 | GUKZOD   | NO <sub>3</sub> | -0.033 | 0.197 | LAVSOR   | NO <sub>3</sub> |
| -0.306 | 0.448 | TULHAK   | NO <sub>3</sub>        | -0.116 | 0.968 | SISQOB   | NO <sub>3</sub> | -0.033 | 0.655 | IGURAE   | NO <sub>3</sub> |
| -0.291 | 0.362 | IFOHER   | NO <sub>3</sub>        | -0.115 | 0.449 | XAFFAM01 | NO <sub>3</sub> | -0.033 | 0.839 | CIZGUP   | NO <sub>3</sub> |
| -0.271 | 0.640 | UCUGIJ   | NO <sub>3</sub>        | -0.115 | 0.471 | CIMVAX   | NO <sub>3</sub> | -0.032 | 0.668 | EQUUNOU  | NO <sub>3</sub> |
| -0.257 | 0.214 | IWUVIF   | NO <sub>3</sub>        | -0.114 | 0.594 | IMZNCU03 | NO <sub>3</sub> | -0.031 | 0.164 | BUXMUE   | NO <sub>3</sub> |
| -0.254 | 0.722 | USEBAX   | NO <sub>3</sub>        | -0.112 | 0.517 | GAKWAQ   | NO <sub>3</sub> | -0.031 | 0.467 | CECSAF   | NO <sub>3</sub> |
| -0.250 | 0.040 | MUPHUB   | NO <sub>3</sub>        | -0.112 | 0.812 | BEYREE   | NO <sub>3</sub> | -0.030 | 0.056 | ZAZXIJ   | NO <sub>3</sub> |
| -0.249 | 0.320 | ATOHUM   | NO <sub>3</sub>        | -0.112 | 0.994 | FORCAR   | NO <sub>3</sub> | -0.030 | 0.237 | CIYJIE   | NO <sub>3</sub> |
| -0.245 | 0.533 | ALUNEA   | NO <sub>3</sub>        | -0.109 | 0.337 | YATVIA   | NO <sub>3</sub> | -0.030 | 0.310 | CIJTIY   | NO <sub>3</sub> |
| -0.243 | 0.097 | YEBQIG   | NO <sub>3</sub>        | -0.109 | 0.376 | WAKNAZ   | NO <sub>3</sub> | -0.028 | 0.408 | EFIZUO   | NO <sub>3</sub> |

|        |       |          |                 |        |       |          |                 |        |       |        |                 |
|--------|-------|----------|-----------------|--------|-------|----------|-----------------|--------|-------|--------|-----------------|
| -0.241 | 0.564 | OZOXEH   | NO <sub>3</sub> | -0.109 | 0.516 | IMZNCU03 | NO <sub>3</sub> | -0.028 | 0.636 | RUYMIJ | NO <sub>3</sub> |
| -0.238 | 0.932 | EMUCIA   | NO <sub>3</sub> | -0.109 | 0.654 | YUFWIH01 | NO <sub>3</sub> | -0.027 | 0.868 | CIZGOJ | NO <sub>3</sub> |
| -0.236 | 0.375 | ALUNEA   | NO <sub>3</sub> | -0.109 | 0.672 | EQUUNUA  | NO <sub>3</sub> | -0.026 | 0.387 | VETFAC | NO <sub>3</sub> |
| -0.235 | 0.206 | CEPMAM   | NO <sub>3</sub> | -0.107 | 0.626 | TORGUE   | NO <sub>3</sub> | -0.026 | 0.621 | JAFWOD | NO <sub>3</sub> |
| -0.232 | 0.110 | EYUCIL   | NO <sub>3</sub> | -0.107 | 0.807 | QAWSEO   | NO <sub>3</sub> | -0.026 | 0.811 | JAMDIK | NO <sub>3</sub> |
| -0.228 | 0.317 | COZRAM   | NO <sub>3</sub> | -0.106 | 0.643 | CIHYUP   | NO <sub>3</sub> | -0.024 | 0.107 | KUYWAE | NO <sub>3</sub> |
| -0.226 | 0.226 | GUUVHUC  | NO <sub>3</sub> | -0.106 | 0.709 | EVONUA   | NO <sub>3</sub> | -0.024 | 0.242 | VIDYIQ | NO <sub>3</sub> |
| -0.224 | 0.200 | QEKJOG   | NO <sub>3</sub> | -0.106 | 0.868 | ELIRAT   | NO <sub>3</sub> | -0.024 | 0.635 | YIYROO | NO <sub>3</sub> |
| -0.221 | 0.687 | VUHFUA   | NO <sub>3</sub> | -0.105 | 0.479 | PAXQEK   | NO <sub>3</sub> | -0.023 | 0.382 | LONTAJ | NO <sub>3</sub> |
| -0.220 | 0.322 | IZOJOW   | NO <sub>3</sub> | -0.105 | 0.479 | PAXQEK01 | NO <sub>3</sub> | -0.023 | 0.499 | AXIHUK | NO <sub>3</sub> |
| -0.220 | 0.717 | CEPMAM   | NO <sub>3</sub> | -0.105 | 0.595 | BADXEL   | NO <sub>3</sub> | -0.023 | 0.521 | IMZNCU | NO <sub>3</sub> |
| -0.219 | 0.287 | YEWUWU   | NO <sub>3</sub> | -0.105 | 0.595 | BADXEL01 | NO <sub>3</sub> | -0.023 | 0.555 | XUKYIN | NO <sub>3</sub> |
| -0.219 | 0.404 | OFIZIN   | NO <sub>3</sub> | -0.104 | 0.438 | KEZZEW   | NO <sub>3</sub> | -0.023 | 0.564 | PIRZUM | NO <sub>3</sub> |
| -0.218 | 0.340 | PEBWIE   | NO <sub>3</sub> | -0.104 | 0.652 | PAZMIN   | NO <sub>3</sub> | -0.023 | 0.677 | IWURUO | NO <sub>3</sub> |
| -0.218 | 0.483 | IZOJIQ   | NO <sub>3</sub> | -0.104 | 0.735 | ALABAS   | NO <sub>3</sub> | -0.023 | 0.853 | XAYTIB | NO <sub>3</sub> |
| -0.216 | 0.296 | HIPPIG   | NO <sub>3</sub> | -0.103 | 0.481 | YONQAV   | NO <sub>3</sub> | -0.022 | 0.571 | WODSOY | NO <sub>3</sub> |
| -0.213 | 0.508 | WEFWIO   | NO <sub>3</sub> | -0.101 | 0.333 | EHALII   | NO <sub>3</sub> | -0.021 | 0.614 | QAWSOY | NO <sub>3</sub> |
| -0.207 | 0.488 | OPASEF   | NO <sub>3</sub> | -0.101 | 0.597 | PAZMEJ   | NO <sub>3</sub> | -0.020 | 0.432 | BIZTIN | NO <sub>3</sub> |
| -0.206 | 0.156 | IBAQIM   | NO <sub>3</sub> | -0.099 | 0.593 | AGIFIH   | NO <sub>3</sub> | -0.020 | 0.445 | KATFEQ | NO <sub>3</sub> |
| -0.203 | 0.394 | SIXVOL   | NO <sub>3</sub> | -0.097 | 0.463 | WIJVOC   | NO <sub>3</sub> | -0.020 | 0.789 | QOZWIL | NO <sub>3</sub> |
| -0.201 | 0.223 | AMBZPB10 | NO <sub>3</sub> | -0.094 | 0.357 | FAWKOD   | NO <sub>3</sub> | -0.020 | 0.881 | HECFOL | NO <sub>3</sub> |
| -0.201 | 0.398 | ATOCIV   | NO <sub>3</sub> | -0.094 | 0.533 | TOJGAB   | NO <sub>3</sub> | -0.019 | 0.427 | SOLKAF | NO <sub>3</sub> |
| -0.200 | 0.491 | NEXQIR   | NO <sub>3</sub> | -0.093 | 0.646 | QEKKIB   | NO <sub>3</sub> | -0.019 | 0.450 | QAQPEF | NO <sub>3</sub> |
| -0.199 | 0.585 | NEXQIR   | NO <sub>3</sub> | -0.091 | 0.229 | ZAZXOP   | NO <sub>3</sub> | -0.017 | 0.194 | UJAZAG | NO <sub>3</sub> |
| -0.197 | 0.355 | WUZNEM   | NO <sub>3</sub> | -0.089 | 0.480 | ATOCIV02 | NO <sub>3</sub> | -0.017 | 0.390 | LIYMIP | NO <sub>3</sub> |
| -0.195 | 0.487 | BUSSAL   | NO <sub>3</sub> | -0.089 | 0.614 | ITOMOV   | NO <sub>3</sub> | -0.016 | 0.670 | OBUBET | NO <sub>3</sub> |
| -0.195 | 0.604 | REWTES   | NO <sub>3</sub> | -0.087 | 0.500 | XARWES   | NO <sub>3</sub> | -0.016 | 0.978 | DOYXOF | NO <sub>3</sub> |
| -0.195 | 0.642 | TEBTEA   | NO <sub>3</sub> | -0.085 | 0.100 | BACPAY   | NO <sub>3</sub> | -0.015 | 0.653 | MALKAL | NO <sub>3</sub> |
| -0.194 | 0.508 | VIXPIB   | NO <sub>3</sub> | -0.084 | 0.994 | FOGGIT   | NO <sub>3</sub> | -0.015 | 0.718 | IWUSAV | NO <sub>3</sub> |
| -0.193 | 0.288 | TUZLAB   | NO <sub>3</sub> | -0.083 | 0.167 | LAVSOR   | NO <sub>3</sub> | -0.015 | 0.781 | MALKOZ | NO <sub>3</sub> |
| -0.193 | 0.614 | BORNAG01 | NO <sub>3</sub> | -0.083 | 0.784 | QOCYAI   | NO <sub>3</sub> | -0.015 | 0.853 | HOPZIW | NO <sub>3</sub> |
| -0.188 | 0.280 | NEXQIR   | NO <sub>3</sub> | -0.083 | 0.913 | VOSPOK   | NO <sub>3</sub> | -0.014 | 0.258 | QOZVOQ | NO <sub>3</sub> |
| -0.186 | 0.322 | ITEPIH   | NO <sub>3</sub> | -0.082 | 0.404 | SABNIT01 | NO <sub>3</sub> | -0.014 | 0.579 | XUCGAE | NO <sub>3</sub> |
| -0.185 | 0.452 | XIYYOT   | NO <sub>3</sub> | -0.082 | 0.405 | XEQYID   | NO <sub>3</sub> | -0.014 | 0.741 | PILYAK | NO <sub>3</sub> |
| -0.184 | 0.399 | BOFLIS   | NO <sub>3</sub> | -0.082 | 0.482 | MOKKAA   | NO <sub>3</sub> | -0.012 | 0.307 | IDUFIX | NO <sub>3</sub> |
| -0.184 | 0.584 | KIPYIT   | NO <sub>3</sub> | -0.080 | 0.437 | WUYUYUK  | NO <sub>3</sub> | -0.012 | 0.498 | YILHIL | NO <sub>3</sub> |
| -0.183 | 0.480 | AFOGIM   | NO <sub>3</sub> | -0.080 | 0.632 | ZUQWAL   | NO <sub>3</sub> | -0.012 | 0.602 | IPASOH | NO <sub>3</sub> |
| -0.183 | 0.577 | KIGSUP   | NO <sub>3</sub> | -0.080 | 0.639 | TIJCEU   | NO <sub>3</sub> | -0.011 | 0.161 | PUZFOG | NO <sub>3</sub> |
| -0.182 | 0.799 | ATOCUJ   | NO <sub>3</sub> | -0.079 | 0.785 | WAKNON   | NO <sub>3</sub> | -0.011 | 0.634 | XIZQUS | NO <sub>3</sub> |
| -0.181 | 0.361 | JADMUZ   | NO <sub>3</sub> | -0.078 | 0.777 | AQIVON   | NO <sub>3</sub> | -0.011 | 0.685 | MABQOX | NO <sub>3</sub> |
| -0.181 | 0.573 | XOLMAM   | NO <sub>3</sub> | -0.077 | 0.639 | PENZEO   | NO <sub>3</sub> | -0.011 | 0.752 | OHIXEK | NO <sub>3</sub> |

|        |       |          |                 |        |       |          |                 |        |       |          |                 |
|--------|-------|----------|-----------------|--------|-------|----------|-----------------|--------|-------|----------|-----------------|
| -0.181 | 0.720 | QOYDIR02 | NO <sub>3</sub> | -0.077 | 0.745 | ASAFEF   | NO <sub>3</sub> | -0.011 | 0.762 | GEPFIS   | NO <sub>3</sub> |
| -0.181 | 0.818 | VEQNEM   | NO <sub>3</sub> | -0.076 | 0.099 | KEBFAY01 | NO <sub>3</sub> | -0.010 | 0.166 | EHALII   | NO <sub>3</sub> |
| -0.180 | 0.321 | JAJYEZ   | NO <sub>3</sub> | -0.076 | 0.104 | BACNUQ   | NO <sub>3</sub> | -0.010 | 0.803 | LURFIO   | NO <sub>3</sub> |
| -0.180 | 0.618 | EVOLAC   | NO <sub>3</sub> | -0.076 | 0.717 | XEVQEW   | NO <sub>3</sub> | -0.009 | 0.643 | AFEGEY   | NO <sub>3</sub> |
| -0.179 | 0.878 | HELGUA   | NO <sub>3</sub> | -0.075 | 0.659 | TASPEK   | NO <sub>3</sub> | -0.008 | 0.227 | NCIMCU   | NO <sub>3</sub> |
| -0.178 | 0.237 | YUYDAZ   | NO <sub>3</sub> | -0.072 | 0.307 | HISSUY   | NO <sub>3</sub> | -0.008 | 0.310 | QAQPAB   | NO <sub>3</sub> |
| -0.178 | 0.719 | ELUKIF   | NO <sub>3</sub> | -0.072 | 0.322 | NDPYAG   | NO <sub>3</sub> | -0.008 | 0.462 | BAWDIM11 | NO <sub>3</sub> |
| -0.177 | 0.682 | BORNAG02 | NO <sub>3</sub> | -0.072 | 0.475 | YUYDAZ   | NO <sub>3</sub> | -0.008 | 0.526 | MIYWOH   | NO <sub>3</sub> |
| -0.174 | 0.639 | MIYWOH   | NO <sub>3</sub> | -0.072 | 0.782 | EFIZUO   | NO <sub>3</sub> | -0.007 | 0.491 | IBOFEL   | NO <sub>3</sub> |
| -0.172 | 0.488 | TISKAJ   | NO <sub>3</sub> | -0.072 | 0.909 | MOYRIB   | NO <sub>3</sub> | -0.006 | 0.633 | HELGOU   | NO <sub>3</sub> |
| -0.172 | 0.562 | QAWSOY   | NO <sub>3</sub> | -0.071 | 0.957 | LAMCAE   | NO <sub>3</sub> | -0.006 | 0.663 | ZICZAO   | NO <sub>3</sub> |
| -0.168 | 0.189 | GIHLIU   | NO <sub>3</sub> | -0.070 | 0.045 | MICVEA   | NO <sub>3</sub> | -0.006 | 0.690 | RIXFOU   | NO <sub>3</sub> |
| -0.168 | 0.338 | OMABAH   | NO <sub>3</sub> | -0.070 | 0.415 | NOQTAP   | NO <sub>3</sub> | -0.005 | 0.576 | YIYRII   | NO <sub>3</sub> |
| -0.168 | 0.567 | PUBWEP   | NO <sub>3</sub> | -0.070 | 0.575 | KEXHUQ   | NO <sub>3</sub> | -0.005 | 0.782 | QOZWEH   | NO <sub>3</sub> |
| -0.165 | 0.050 | DAYMOG   | NO <sub>3</sub> | -0.070 | 0.661 | UYENIW   | NO <sub>3</sub> | -0.004 | 0.593 | ETOXUH   | NO <sub>3</sub> |
| -0.165 | 0.340 | IZOJOW   | NO <sub>3</sub> |        |       |          |                 |        |       |          |                 |

<sup>a</sup>The structure involves a co-crystallized acetone molecule. <sup>b</sup>The structure involves a co-crystallized dimethyl sulfoxide molecule.

## References

1. F. H. Allen, *Acta Crystallogr. B*, 2002, **58**, 380-388.
2. A. Bauza, A. Frontera and T. J. Mooibroek, *Cryst. Growth Des.*, 2016, **16**, 5520-5524.
3. A. Bauza, A. Frontera and T. J. Mooibroek, *Nat. Commun.*, 2017, **8**, Art. Nr. 14522.
4. T. J. Mooibroek and P. Gamez, *CrystEngComm*, 2012, **14**, 8462-8467.
